# Supplementary material for: A Pharmacometric Analysis of Patient-Reported Outcomes in Breast Cancer Patients Through Item Response Theory
Source: PubMed Central journal article supplement (PMC5908825; doi:10.1007/s11095-018-2403-8), 2018-04-19
Supplement: 11095_2018_2403_MOESM1_ESM.pdf [file 11095_2018_2403_MOESM1_ESM.pdf]

## Supplementary material: Tables and figures

**Table S1:** Questions included in the functional assessment of cancer therapy- breast (FACT-B) questionnaire, abbreviated label and information on reverse items

| Subscale                        | FACT-B item                                                                     | Abbreviated label             | Reverse item? | Item number |
|---------------------------------|---------------------------------------------------------------------------------|-------------------------------|---------------|-------------|
| <b>Physical well-being</b>      | I have a lack of energy                                                         | Lack of energy                | Yes           | 1           |
|                                 | I have nausea                                                                   | Have nausea                   | Yes           | 2           |
|                                 | Because of my physical condition, I have trouble meeting the needs of my family | Meeting family needs          | Yes           | 3           |
|                                 | I have pain                                                                     | Have pain                     | Yes           | 4           |
|                                 | I am bothered by side effects of treatment                                      | Bothered by side effects      | Yes           | 5           |
|                                 | I feel ill                                                                      | Feel ill                      | Yes           | 6           |
|                                 | I am forced to spend time in bed                                                | Spend time in bed             | Yes           | 7           |
| <b>Social/family well-being</b> | I feel close to my friends                                                      | Close to friends              | No            | 8           |
|                                 | I get emotional support from my family                                          | Emotional support from family | No            | 9           |
|                                 | I get support from my friends                                                   | Support from friends          | No            | 10          |
|                                 | My family has accepted my illness                                               | Family accept illness         | No            | 11          |
|                                 | I am satisfied with family communication about my illness                       | Family comm. about illness    | No            | 12          |
|                                 | I feel close to my partner (or the person who is my main support)               | Close to partner              | No            | 13          |
|                                 | I am satisfied with my sex life                                                 | Sex life                      | No            | 14          |
| <b>Emotional well-being</b>     | I feel sad                                                                      | Feel sad                      | Yes           | 15          |
|                                 | I am satisfied with how I am coping with my illness                             | Satisf. coping with illness   | No            | 16          |
|                                 | I am losing hope in the fight against my illness                                | No hope with fight vs illness | Yes           | 17          |
|                                 | I feel nervous                                                                  | Feel nervous                  | Yes           | 18          |
|                                 | I worry about dying                                                             | Worry about dying             | Yes           | 19          |
|                                 | I worry that my condition will get worse                                        | Condition get worse           | Yes           | 20          |
| <b>Functional well-being</b>    | I am able to work (include work at home)                                        | Able to work                  | No            | 21          |
|                                 | My work (include work at home) is fulfilling                                    | Work fulfilling               | No            | 22          |
|                                 | I am able to enjoy life                                                         | Enjoy life                    | No            | 23          |
|                                 | I have accepted my illness                                                      | Accept my illness             | No            | 24          |
|                                 | I am sleeping well                                                              | Sleeping well                 | No            | 25          |
|                                 | I am enjoying the things I usually do for fun                                   | Usually do for fun            | No            | 26          |

| <b>Subscale</b>               | <b>FACT-B item</b>                                                                | <b>Abbreviated label</b>            | <b>Reverse item?</b> | <b>Item number</b> |
|-------------------------------|-----------------------------------------------------------------------------------|-------------------------------------|----------------------|--------------------|
|                               | I am content with the quality of my life right now                                | Quality of life                     | No                   | 27                 |
| <b>Breast cancer subscale</b> | I have been short of breath                                                       | Short of breath                     | Yes                  | 28                 |
|                               | I am self-conscious about the way I dress                                         | Way I dress                         | Yes                  | 29                 |
|                               | One or both of my arms are swollen or tender                                      | Arms swollen or tender              | Yes                  | 30                 |
|                               | I feel sexually attractive                                                        | Sexually attractive                 | No                   | 31                 |
|                               | I am bothered by hair loss                                                        | Bothered by hair loss               | Yes                  | 32                 |
|                               | I worry that other members of my family might someday get the same illness I have | Family mbr get same illness         | Yes                  | 33                 |
|                               | I worry about the effect of stress on my illness                                  | Effect stress illness               | Yes                  | 34                 |
|                               | I am bothered by a change in weight                                               | Bothered change weight              | Yes                  | 35                 |
|                               | I am able to feel like a woman                                                    | Feel like a woman                   | No                   | 36                 |
|                               | I have certain parts of my body where I experience pain                           | Not included - Not currently scored |                      | -                  |

**Table S2:** Objective function values (OFV) obtained for each breast cancer subscale items when reassigning them to each of the other subscale.

| <b>Item</b>                                           | <b>Subscale</b> | <b>OFV</b> | <b>Difference in OFV from best</b> |
|-------------------------------------------------------|-----------------|------------|------------------------------------|
| <b>Short of breath</b>                                | Physical        | 5475       | 0                                  |
|                                                       | Social/family   | 6001       | 526                                |
|                                                       | Emotional       | 5755       | 280                                |
|                                                       | Functional      | 5858       | 383                                |
| <b>Self-conscious about way I dress</b>               | Physical        | 6038       | 77                                 |
|                                                       | Social/family   | 6210       | 249                                |
|                                                       | Emotional       | 5961       | 0                                  |
|                                                       | Functional      | 6139       | 178                                |
| <b>Arms swollen or tender</b>                         | Physical        | 6147       | 0                                  |
|                                                       | Social/family   | 6373       | 226                                |
|                                                       | Emotional       | 6270       | 123                                |
|                                                       | Functional      | 6336       | 189                                |
| <b>Feel sexually attractive</b>                       | Physical        | 7325       | 473                                |
|                                                       | Social/family   | 7239       | 387                                |
|                                                       | Emotional       | 7366       | 514                                |
|                                                       | Functional      | 6852       | 0                                  |
| <b>Bothered by hair loss</b>                          | Physical        | 6201       | 165                                |
|                                                       | Social/family   | 6284       | 248                                |
|                                                       | Emotional       | 6036       | 0                                  |
|                                                       | Functional      | 6241       | 205                                |
| <b>Worry that family members get the same illness</b> | Physical        | 8209       | 377                                |
|                                                       | Social/family   | 8347       | 515                                |
|                                                       | Emotional       | 7832       | 0                                  |
|                                                       | Functional      | 8299       | 467                                |
| <b>Worry about effect of stress on illness</b>        | Physical        | 7603       | 583                                |
|                                                       | Social/family   | 7914       | 894                                |
|                                                       | Emotional       | 7020       | 0                                  |
|                                                       | Functional      | 7801       | 781                                |
| <b>Bothered by change in weight</b>                   | Physical        | 7231       | 64                                 |
|                                                       | Social/family   | 7381       | 214                                |
|                                                       | Emotional       | 7167       | 0                                  |
|                                                       | Functional      | 7326       | 159                                |
| <b>Feel like a woman</b>                              | Physical        | 7418       | 626                                |
|                                                       | Social/family   | 7104       | 312                                |
|                                                       | Emotional       | 7427       | 635                                |
|                                                       | Functional      | 6792       | 0                                  |

**Table S3:** Item-specific parameter estimates from the final longitudinal item-response theory model.

| Item                          | a     | b <sub>1</sub> | δ <sub>2</sub> | δ <sub>3</sub> | δ <sub>4</sub> |
|-------------------------------|-------|----------------|----------------|----------------|----------------|
| Lack of energy                | 2.07  | -2.32          | 0.973          | 1.02           | 1.27           |
| Have nausea                   | 1.47  | -4.00          | 1.02           | 1.16           | 1.27           |
| Meeting family needs          | 2.56  | -2.25          | 0.689          | 0.876          | 0.977          |
| Have pain                     | 1.75  | -2.71          | 1.04           | 0.964          | 1.23           |
| Bothered by side effects      | 2.07  | -2.70          | 0.879          | 0.991          | 1.21           |
| Feel ill                      | 3.15  | -2.46          | 0.737          | 0.871          | 0.914          |
| Spend time in bed             | 2.83  | -2.63          | 0.765          | 0.709          | 0.913          |
| Close to friends              | 3.04  | -2.18          | 0.630          | 0.719          | 0.831          |
| Emotional support from family | 4.68  | -2.10          | 0.478          | 0.593          | 0.735          |
| Support from friends          | 3.54  | -1.85          | 0.358          | 0.623          | 0.807          |
| Family accept illness         | 2.45  | -2.25          | 0.566          | 0.793          | 0.891          |
| Family comm. about illness    | 3.13  | -2.18          | 0.596          | 0.780          | 0.821          |
| Close to partner              | 2.88  | -2.01          | 0.350          | 0.640          | 0.698          |
| Sex life                      | 1.49  | -1.42          | 0.465          | 0.979          | 1.04           |
| Feel sad                      | 2.19  | -2.47          | 0.983          | 1.09           | 1.21           |
| Satisf. coping with illness   | 0.830 | -3.73          | 1.38           | 1.95           | 2.19           |
| No hope with fight vs illness | 2.06  | -2.68          | 0.611          | 1.04           | 0.876          |
| Feel nervous                  | 2.04  | -2.23          | 0.794          | 0.939          | 1.37           |
| Worry about dying             | 2.18  | -1.69          | 0.571          | 0.740          | 1.21           |
| Condition get worse           | 2.43  | -1.36          | 0.683          | 0.731          | 1.35           |
| Able to work                  | 2.03  | -1.96          | 0.925          | 1.05           | 1.17           |
| Work fulfilling               | 2.62  | -1.65          | 0.648          | 0.952          | 1.04           |
| Enjoy life                    | 4.27  | -1.94          | 0.735          | 0.864          | 0.893          |
| Accept my illness             | 1.69  | -2.34          | 0.763          | 1.04           | 1.20           |
| Sleeping well                 | 1.43  | -2.56          | 1.06           | 1.46           | 1.23           |
| Usually do for fun            | 3.76  | -1.80          | 0.689          | 0.885          | 0.844          |
| Quality of life               | 3.63  | -1.74          | 0.684          | 0.996          | 0.953          |
| Short of breath               | 1.19  | -3.91          | 1.28           | 1.21           | 1.30           |
| Way I dress                   | 0.835 | -4.13          | 1.18           | 1.62           | 1.40           |
| Arms swollen or tender        | 0.765 | -4.59          | 1.64           | 1.23           | 1.49           |
| Sexually attractive           | 1.41  | -1.22          | 0.776          | 1.44           | 1.23           |
| Bothered by hair loss         | 0.840 | -2.82          | 0.796          | 0.854          | 1.00           |
| Family mbr get same illness   | 1.06  | -1.33          | 1.08           | 0.766          | 1.40           |
| Effect stress illness         | 1.51  | -1.80          | 1.21           | 0.963          | 1.29           |
| Bothered change weight        | 0.764 | -3.28          | 1.32           | 1.31           | 1.38           |
| Feel like a woman             | 1.52  | -2.20          | 0.975          | 1.12           | 1.25           |

$b_2 = b_1 + \delta_2$ ;  $b_3 = b_2 + \delta_3$ ;  $b_4 = b_3 + \delta_4$ . See also NONMEM code provided as Supplementary material.

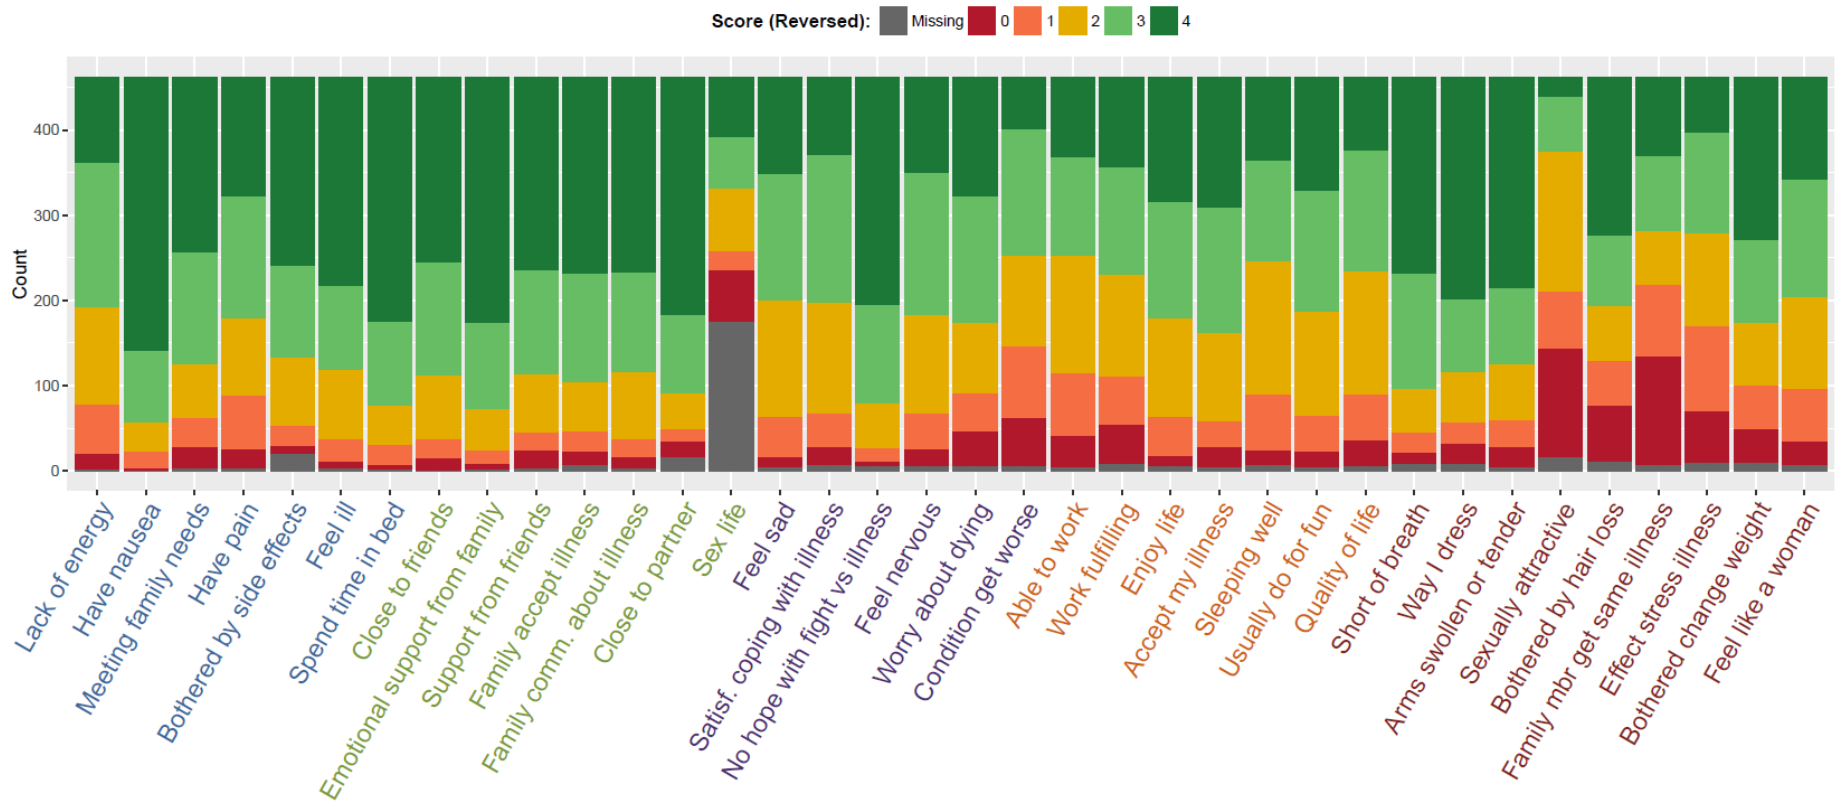

**Figure S1:** Distributions of observed FACT-B scores at baseline in T-DM1 arm. Label color corresponds to the item's subscale: blue for physical, green for social/family, purple for emotional, orange for functional and red for breast-cancer. Scores for reverse items have been reverse-scaled (i.e. higher score indicate better outcome)

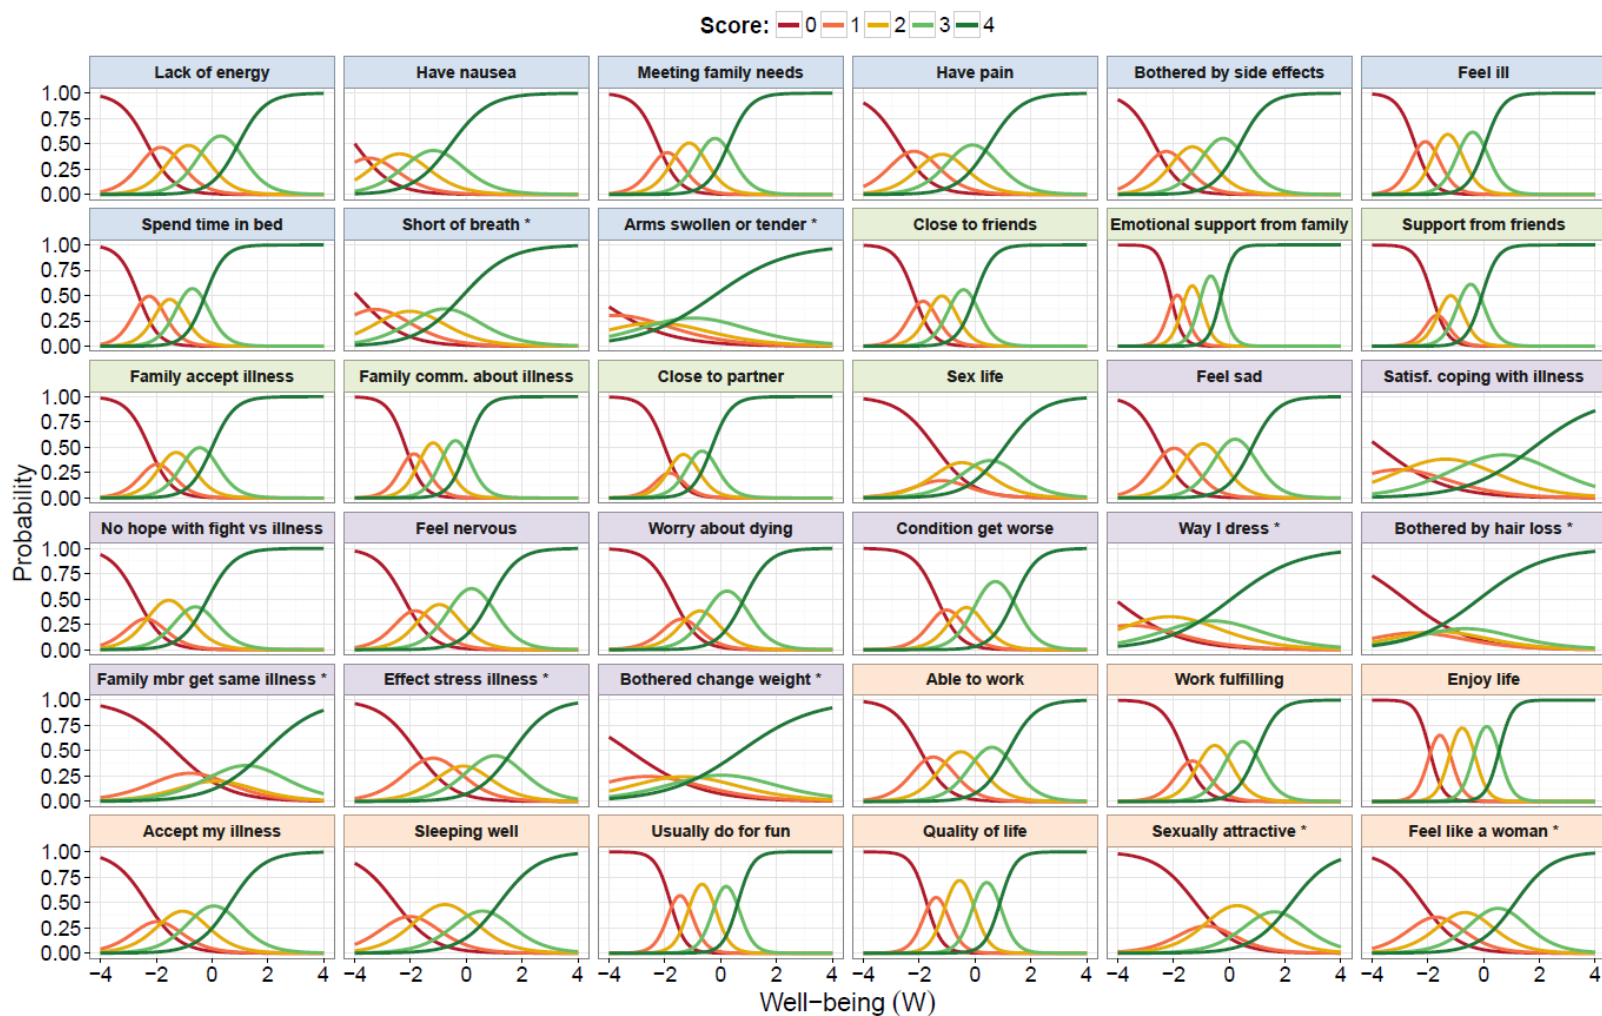

**Figure S2:** Item characteristic curves obtained from the final longitudinal item-response theory model. For each FACT-B item, the probability of each score is plotted against the latent well-being variable  $W$ . Panels' color correspond to the item subscale: blue for physical, green for social/family, purple for emotional and orange for functional. Scores for reverse items have been reverse-scaled (i.e. higher score indicate better outcome). \* Items originally belonging to the breast-cancer subscale.

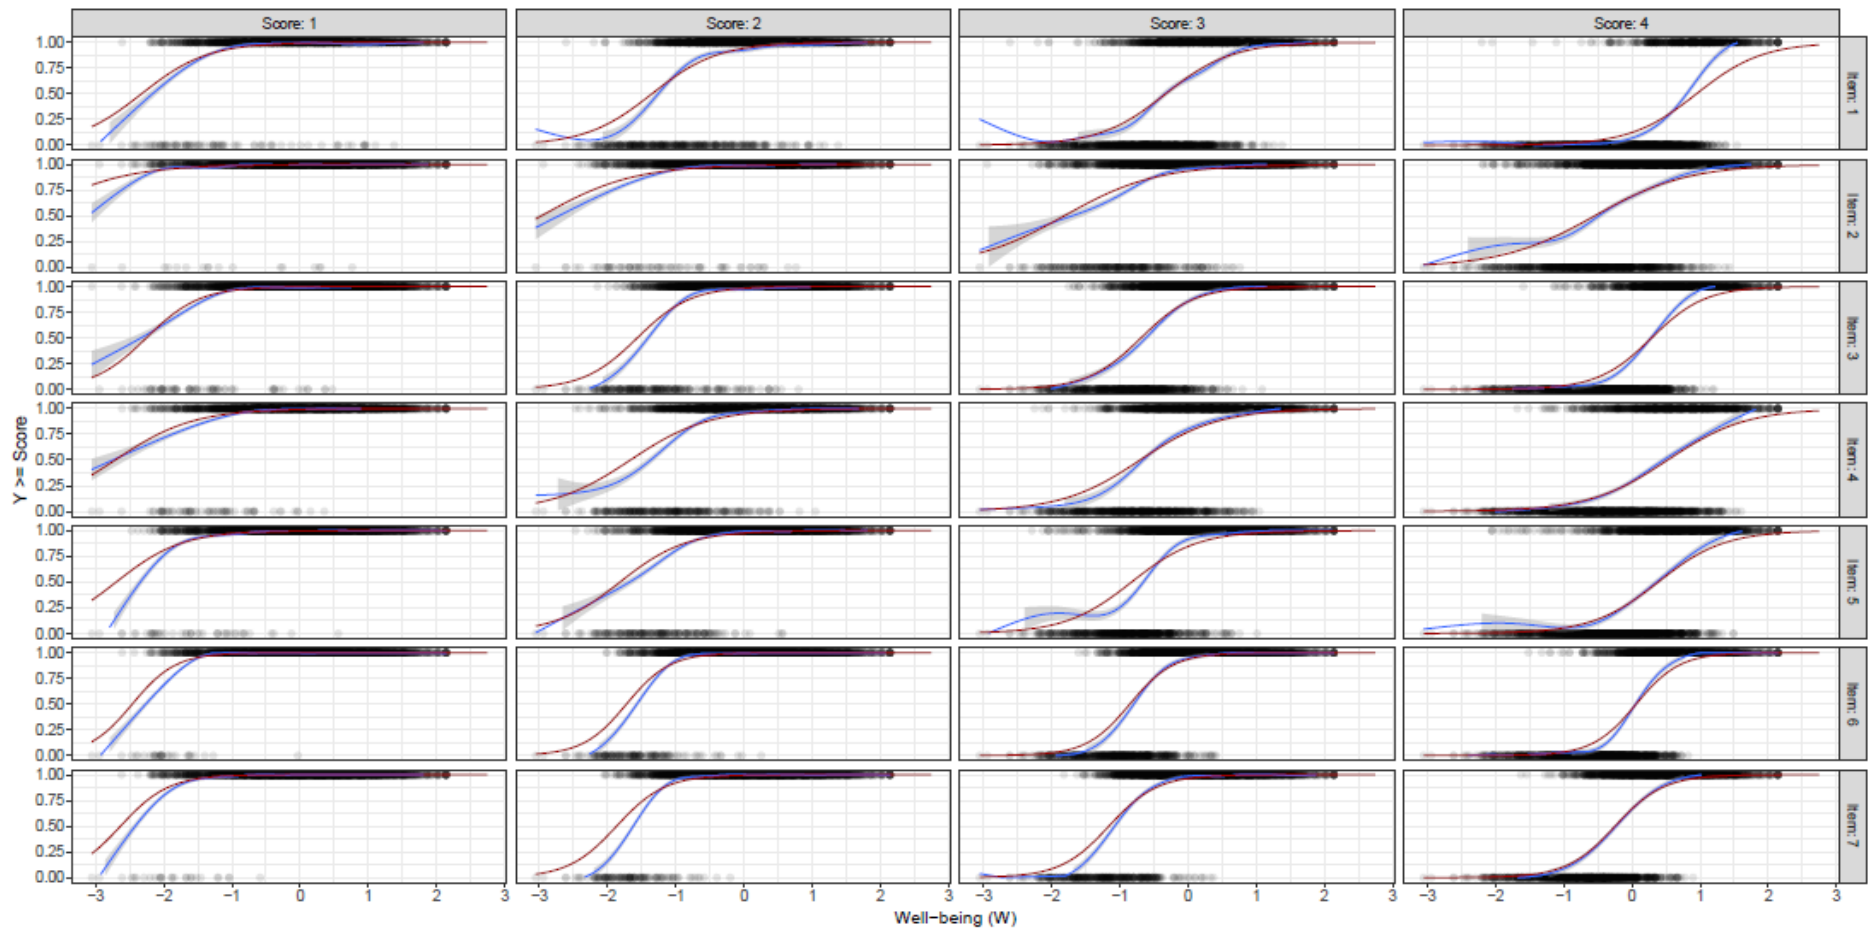

Figure S3: Diagnostic plots comparing the IRT model fit (red line) to the fit of generalized additive model (GAM) with cross-validated cubic spline as a smoothing function (blue line with 95% confidence interval in grey). Item numbers are as described in Table S1.

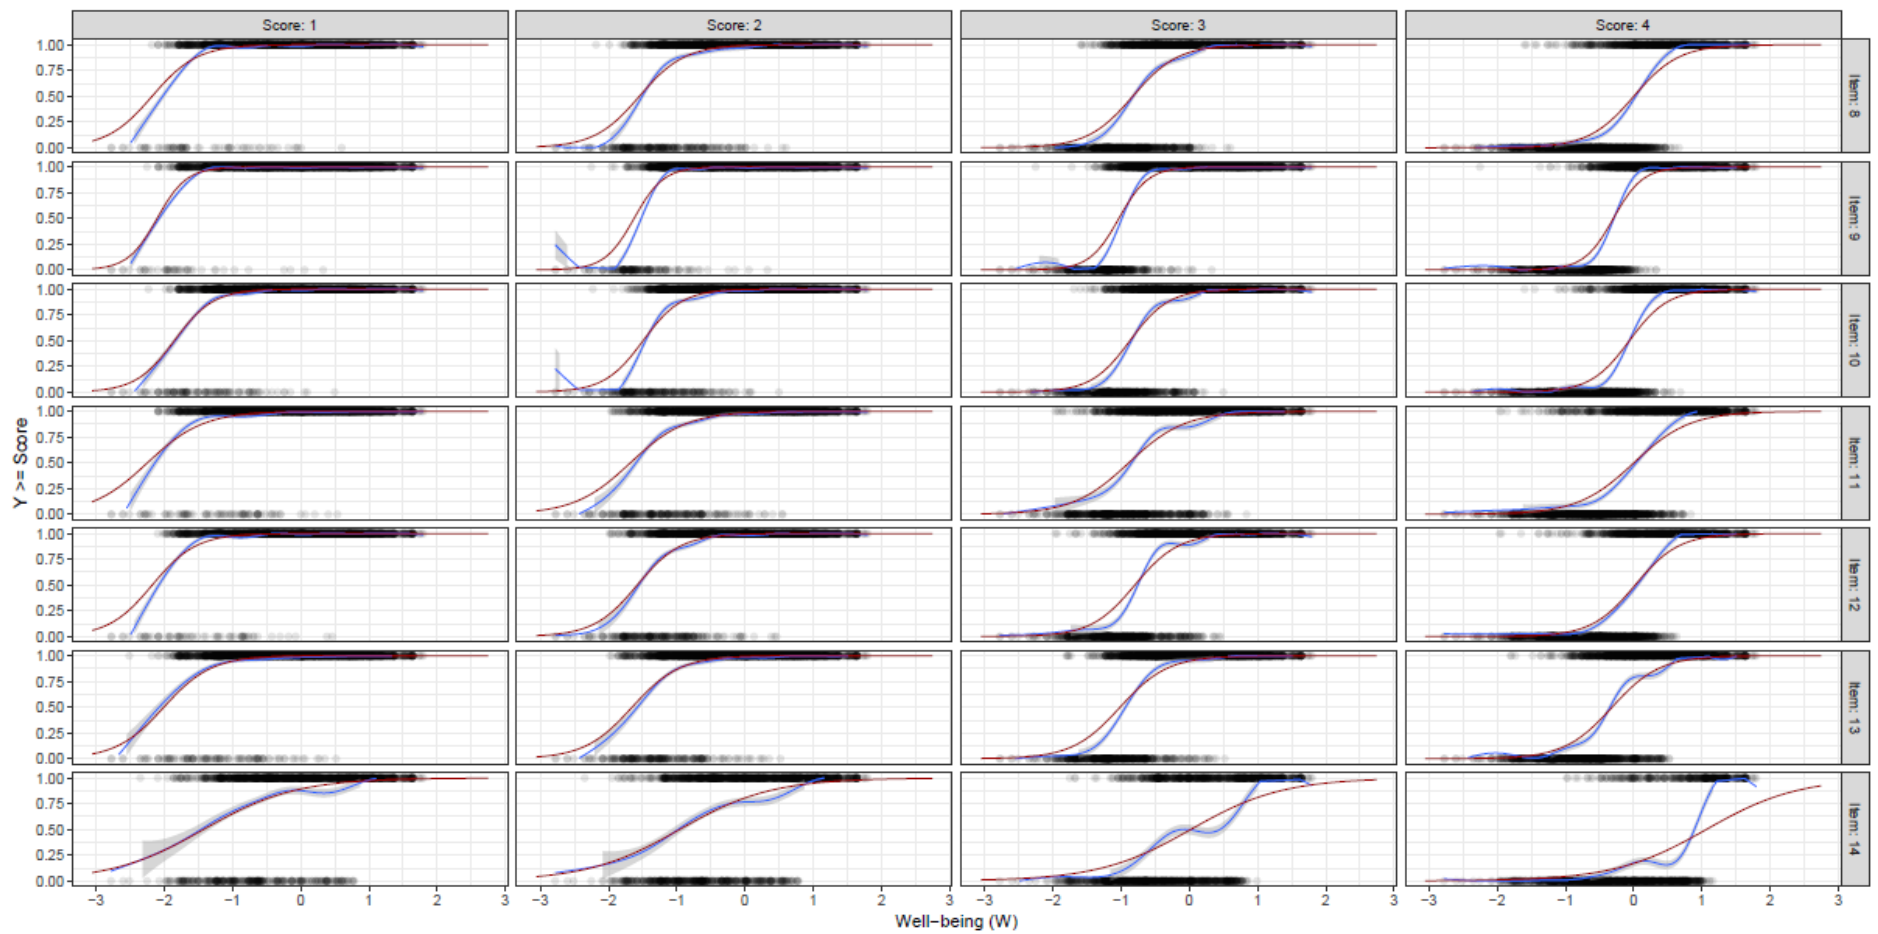

Figure S3 (continued): Diagnostic plots comparing the IRT model fit (red line) to the fit of generalized additive model (GAM) with cross-validated cubic spline as a smoothing function (blue line with 95% confidence interval in grey). Item numbers are as described in Table S1.



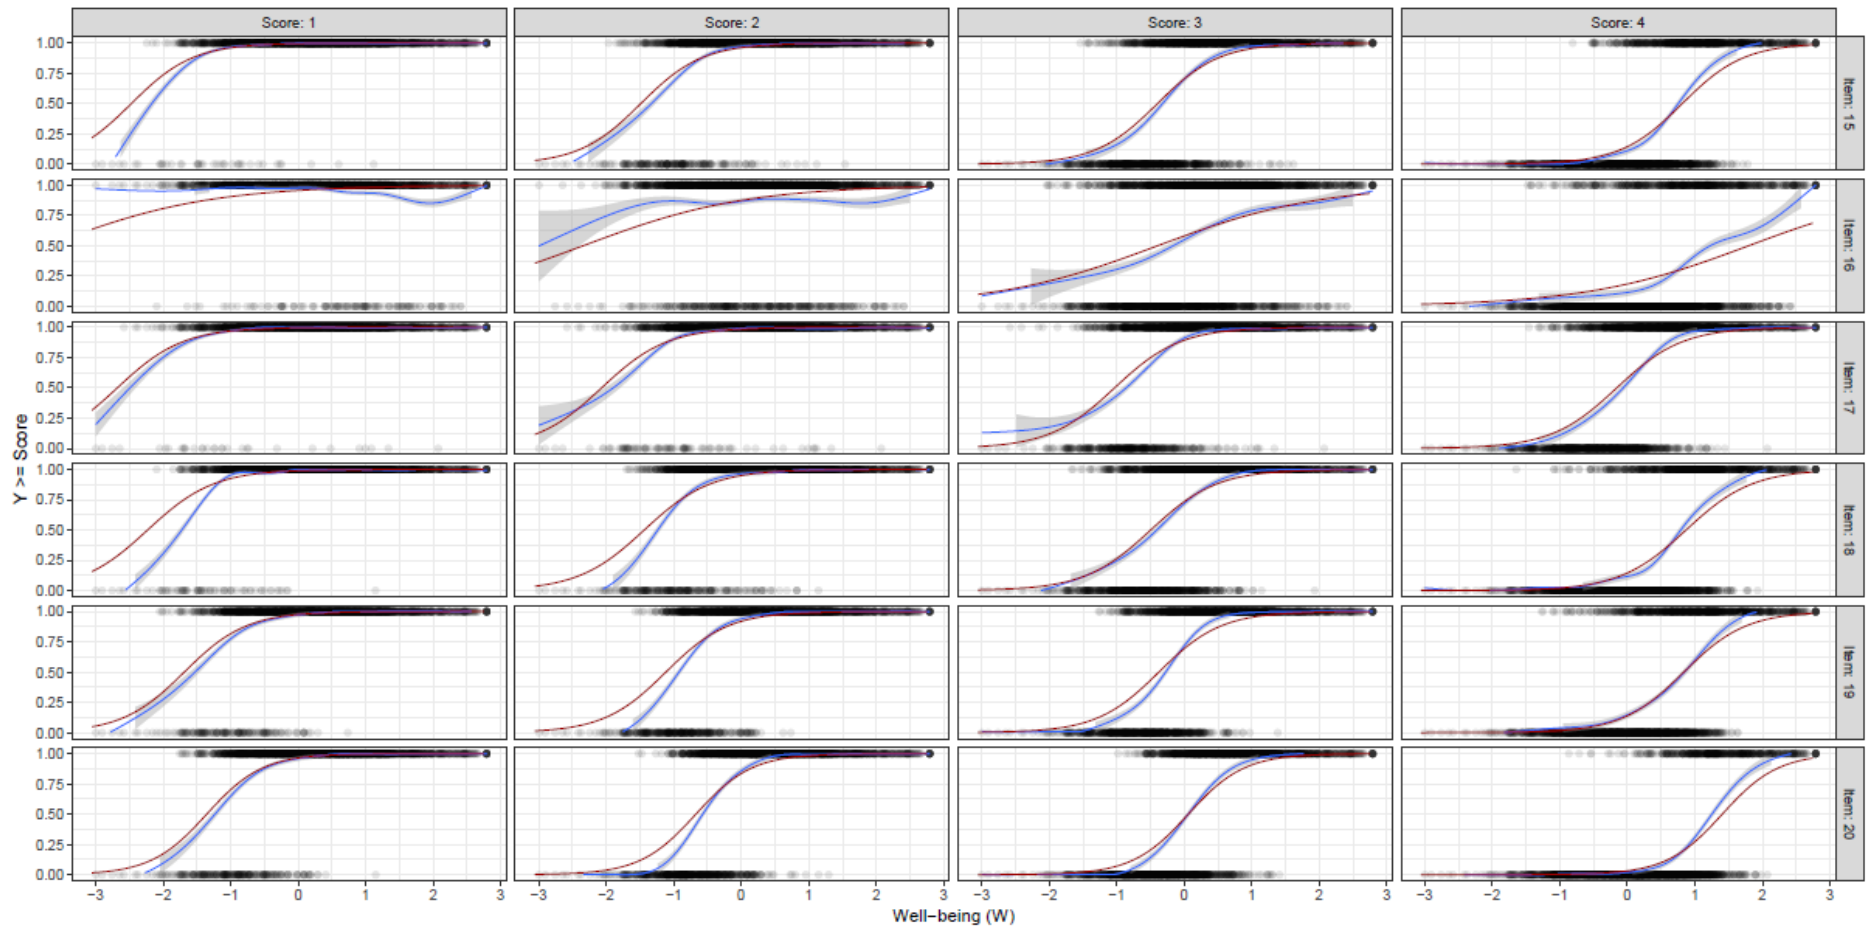

Figure S3 (continued): Diagnostic plots comparing the IRT model fit (red line) to the fit of generalized additive model (GAM) with cross-validated cubic spline as a smoothing function (blue line with 95% confidence interval in grey). Item numbers are as described in Table S1.

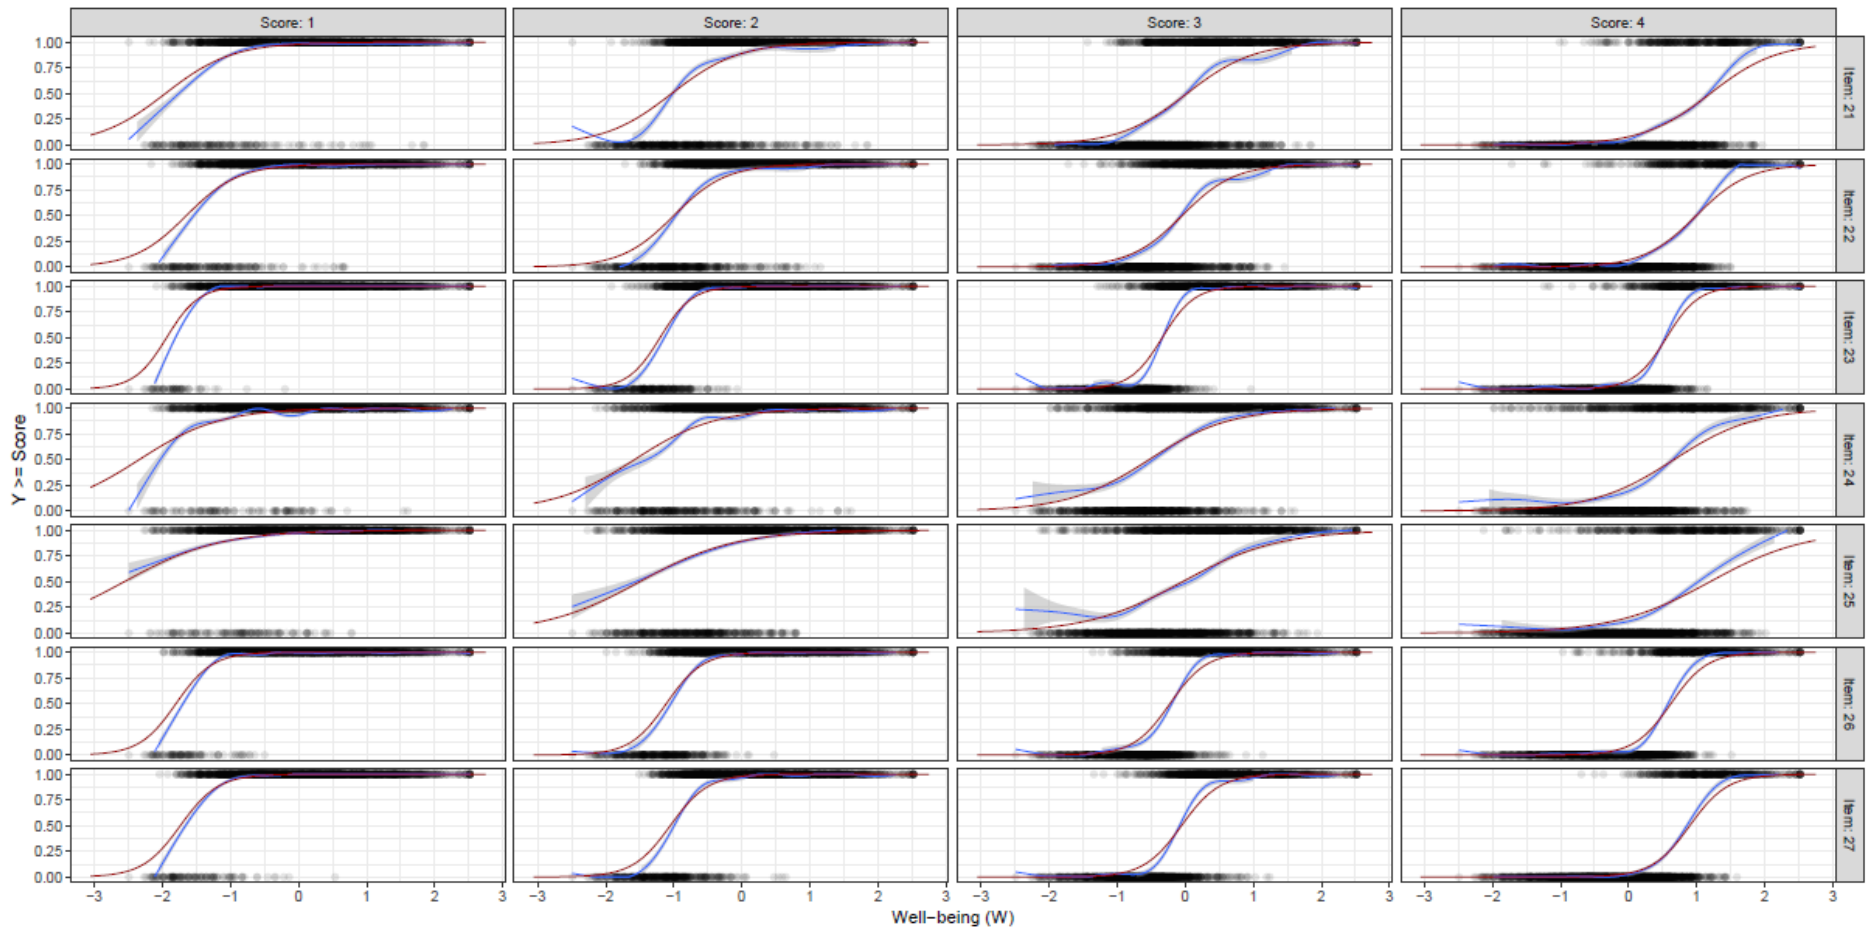

Figure S3 (continued): Diagnostic plots comparing the IRT model fit (red line) to the fit of generalized additive model (GAM) with cross-validated cubic spline as a smoothing function (blue line with 95% confidence interval in grey). Item numbers are as described in Table S1.

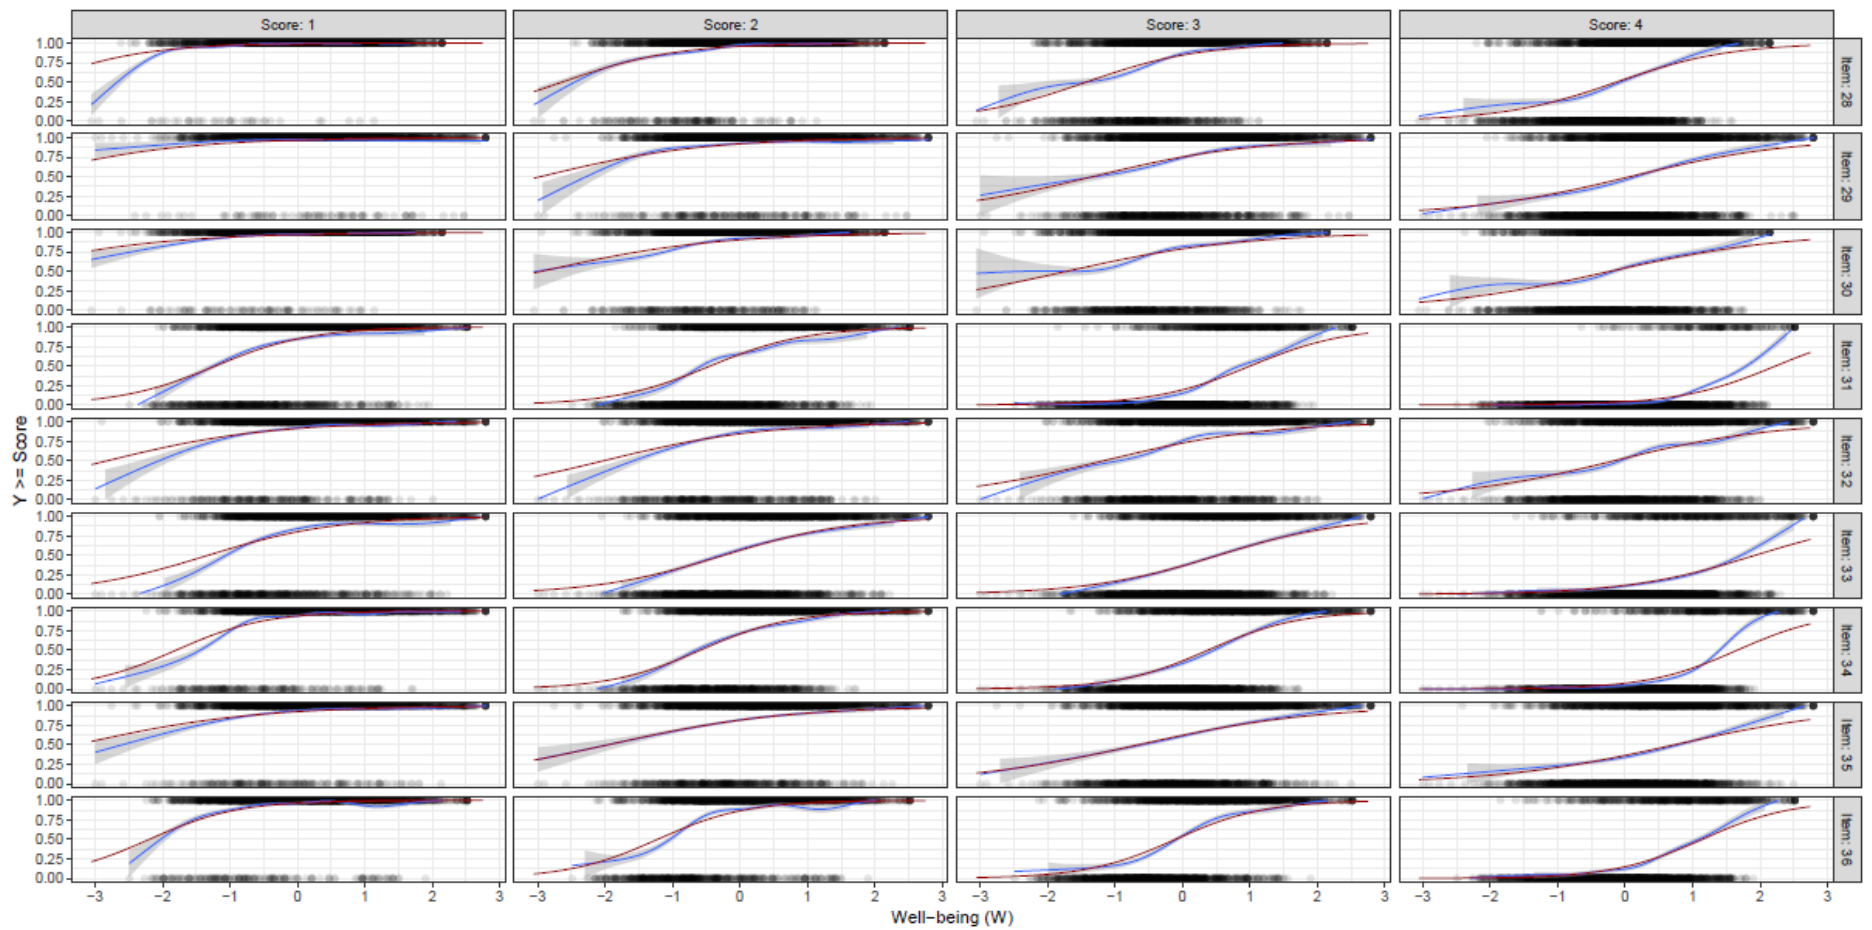

Figure S3 (continued): Diagnostic plots comparing the IRT model fit (red line) to the fit of generalized additive model (GAM) with cross-validated cubic spline as a smoothing function (blue line with 95% confidence interval in grey). Item numbers are as described in Table S1.

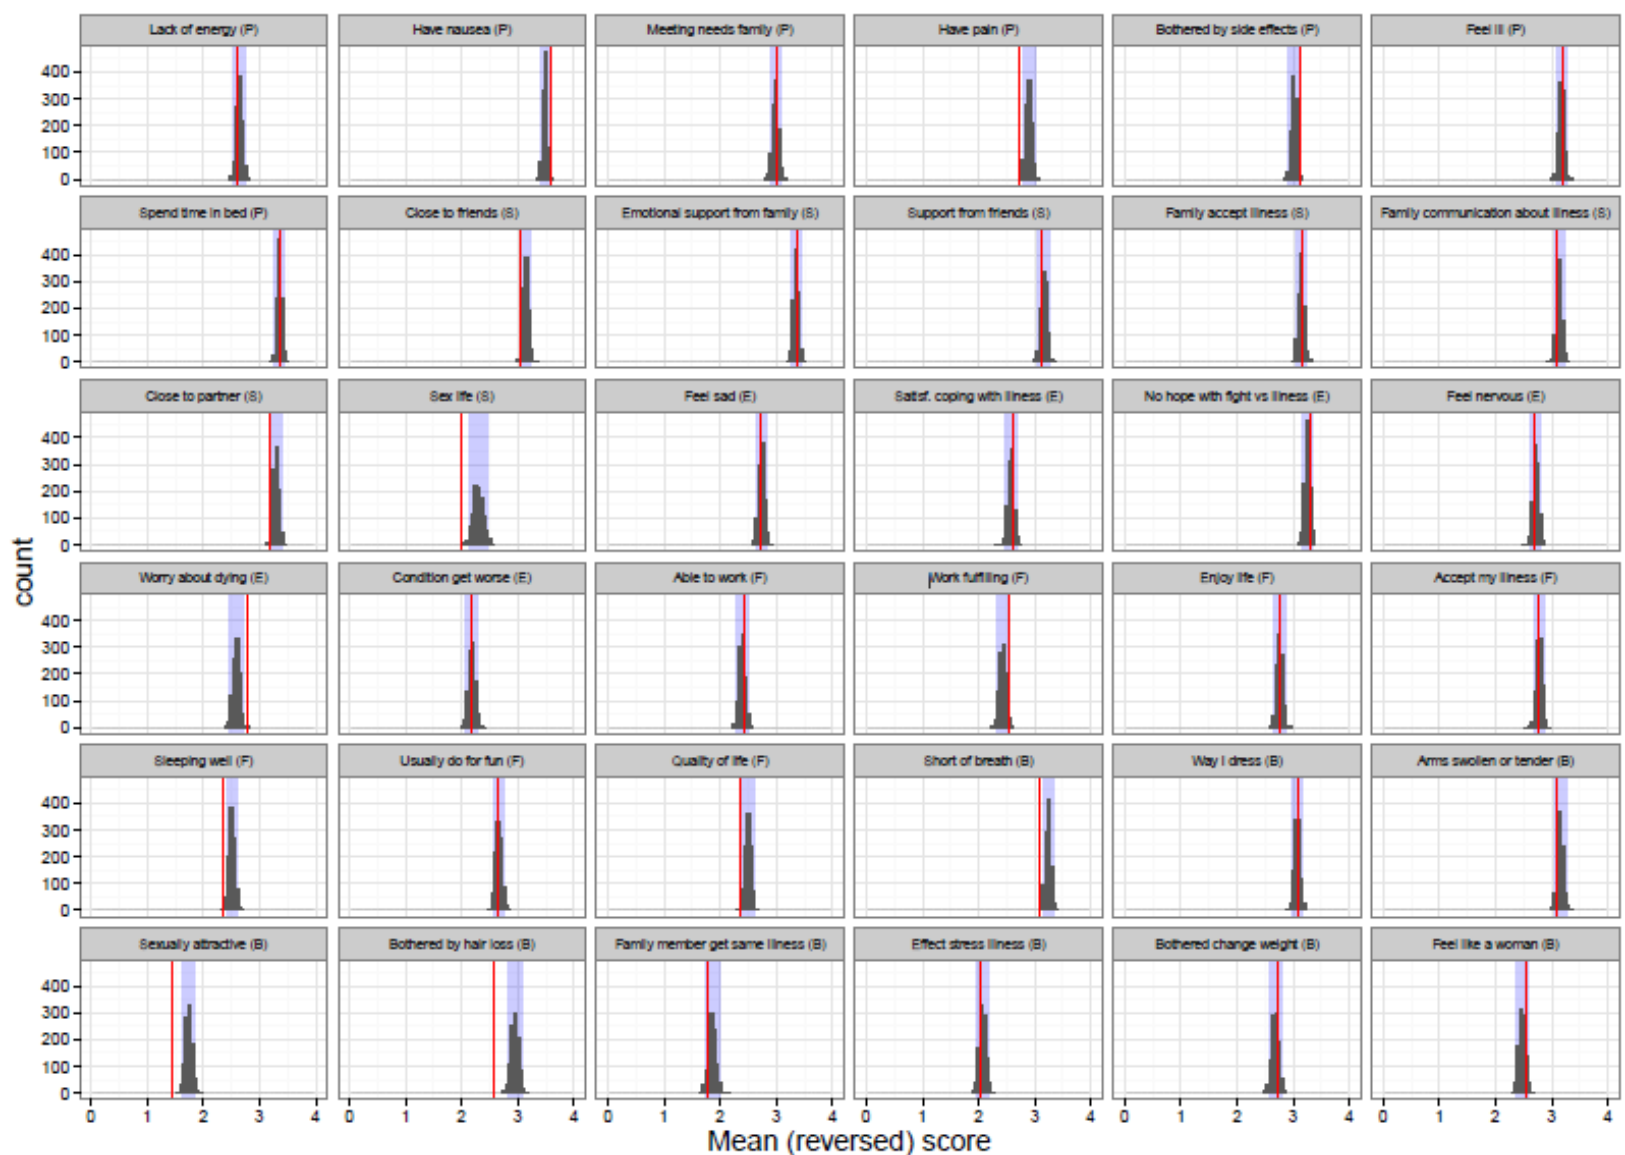

Figure S4: Mean scores for the original capecitabine-plus-lapatinib data set (red) compared to the mean score distribution in the simulated data sets obtained from the base IRT model (distribution in grey and 95% confidence interval in blue).

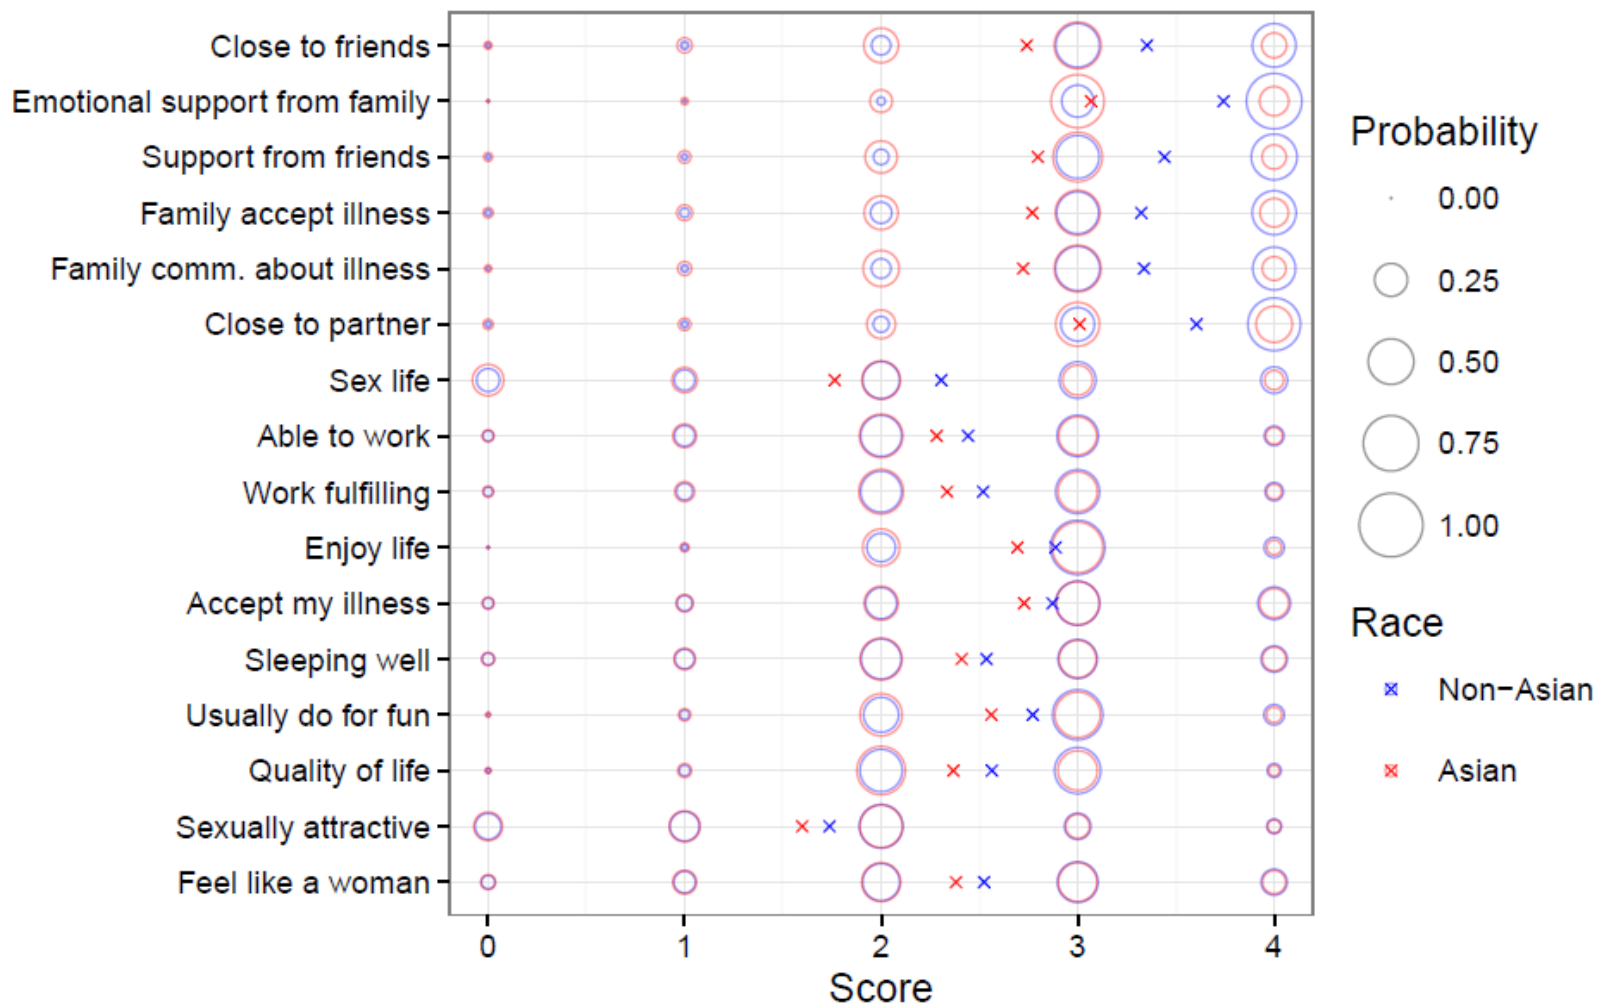

**Figure S5:** Schematic representation of the item score probabilities and expected score at baseline for a typical patient with baseline ECOG of 0, as predicted by the final longitudinal item-response theory model and differentiated by race. Circle surface areas are proportional to the score probability. Cross symbols represent expected scores, calculated as  $\sum_{k=0}^4 P(Y = k) \cdot k$ . Scores for reverse items have been reverse-scaled (i.e. higher score indicate better outcome).

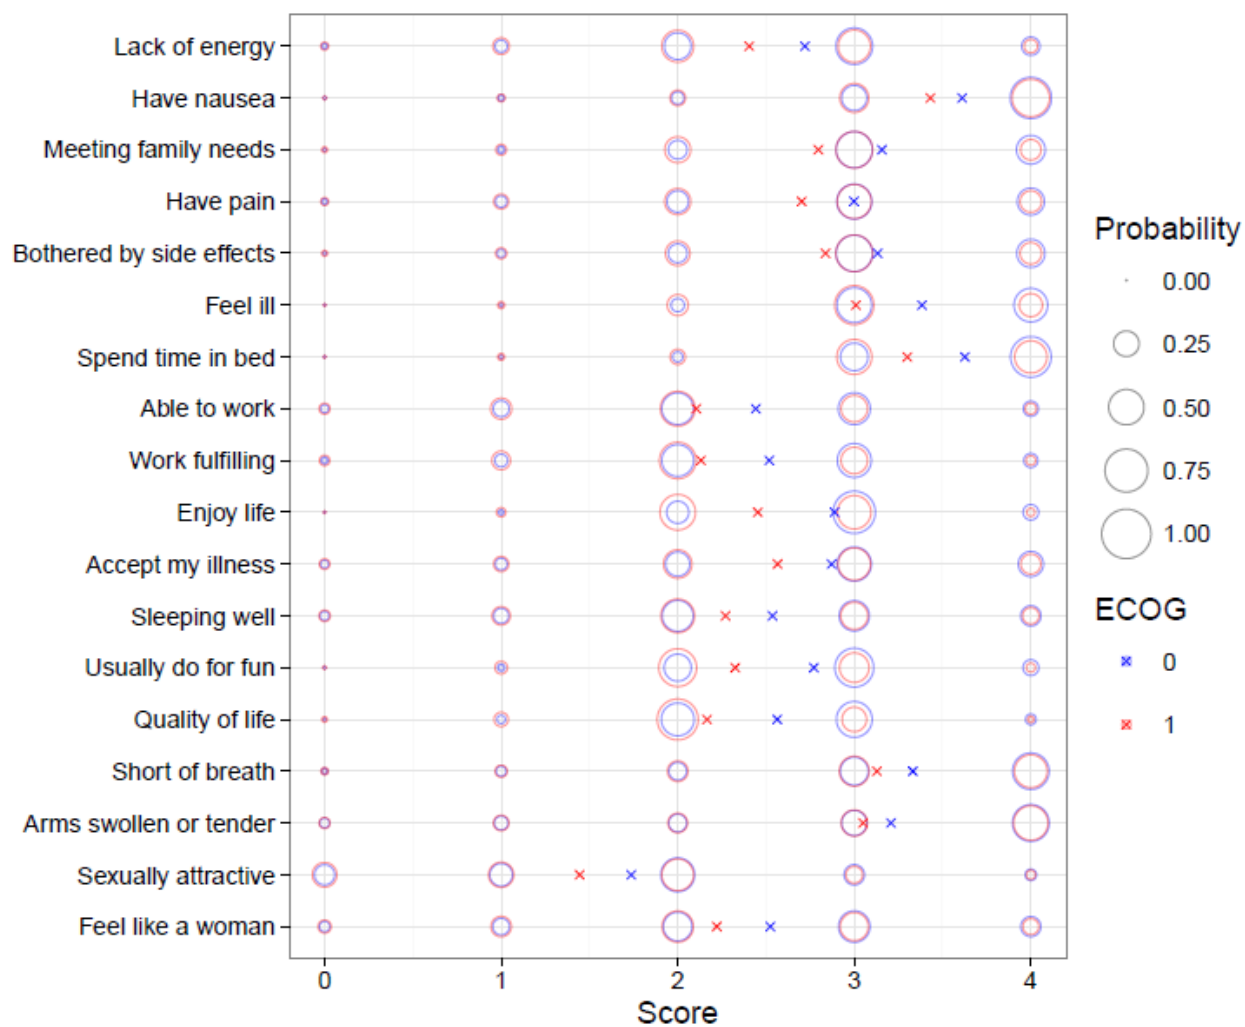

**Figure S6:** Schematic representation of the item score probabilities and expected score at baseline for a typical non-Asian patient, as predicted by the final longitudinal item-response theory model and differentiated by baseline ECOG. Circle surface areas are proportional to the score probability. Cross symbols represent expected scores, calculated as  $\sum_{k=0}^4 P(Y = k) \cdot k$ . Scores for reverse items have been reverse-scaled (i.e. higher score indicate better outcome).
