# Supplementary material for: A Pharmacometric Analysis of Patient-Reported Outcomes in Breast Cancer Patients Through Item Response Theory
Source: PubMed Central journal article supplement (PMC5908825; doi:10.1007/s11095-018-2403-8), 2018-04-19
Supplement: 11095_2018_2403_MOESM2_ESM.pdf [file 11095_2018_2403_MOESM2_ESM.pdf]

# Supplementary material: NONMEM code and example data set

## Example data set for the longitudinal IRT model

| #ID | TRTACT | TIME | VAR | ODV | DV  | MDV | BECOG | RACE2A |
|-----|--------|------|-----|-----|-----|-----|-------|--------|
| 1   | 1      | 0    | 3   | 4   | 0   | 0   | 1     | 0      |
| 1   | 1      | 0    | 4   | 2   | 2   | 0   | 1     | 0      |
| 1   | 1      | 0    | 5   | 3   | 1   | 0   | 1     | 0      |
| 1   | 1      | 0    | 6   | 1   | 1   | 0   | 1     | 0      |
| 1   | 1      | 0    | 7   | 1   | 1   | 0   | 1     | 0      |
| 1   | 1      | 0    | 8   | 2   | 2   | 0   | 1     | 0      |
| 1   | 1      | 0    | 9   | 4   | 0   | 0   | 1     | 0      |
| 1   | 1      | 0    | 10  | 2   | 2   | 0   | 1     | 0      |
| 1   | 1      | 0    | 11  | 4   | 4   | 0   | 1     | 0      |
| 1   | 1      | 0    | 12  | 2   | 2   | 0   | 1     | 0      |
| 1   | 1      | 0    | 13  | 4   | 4   | 0   | 1     | 0      |
| 1   | 1      | 0    | 14  | 3   | 3   | 0   | 1     | 0      |
| 1   | 1      | 0    | 15  | 4   | 4   | 0   | 1     | 0      |
| 1   | 1      | 0    | 16  | -99 | -99 | 1   | 1     | 0      |
| 1   | 1      | 0    | 17  | 0   | 4   | 0   | 1     | 0      |
| 1   | 1      | 0    | 18  | 3   | 3   | 0   | 1     | 0      |
| 1   | 1      | 0    | 19  | 0   | 4   | 0   | 1     | 0      |
| 1   | 1      | 0    | 20  | 0   | 4   | 0   | 1     | 0      |
| 1   | 1      | 0    | 21  | 1   | 3   | 0   | 1     | 0      |
| 1   | 1      | 0    | 22  | 2   | 2   | 0   | 1     | 0      |
| 1   | 1      | 0    | 23  | 0   | 0   | 0   | 1     | 0      |
| 1   | 1      | 0    | 24  | 2   | 2   | 0   | 1     | 0      |
| 1   | 1      | 0    | 25  | 2   | 2   | 0   | 1     | 0      |
| 1   | 1      | 0    | 26  | 3   | 3   | 0   | 1     | 0      |
| 1   | 1      | 0    | 27  | 2   | 2   | 0   | 1     | 0      |
| 1   | 1      | 0    | 28  | 0   | 0   | 0   | 1     | 0      |
| 1   | 1      | 0    | 29  | 2   | 2   | 0   | 1     | 0      |
| 1   | 1      | 0    | 30  | 2   | 2   | 0   | 1     | 0      |
| 1   | 1      | 0    | 31  | 3   | 1   | 0   | 1     | 0      |
| 1   | 1      | 0    | 32  | 0   | 4   | 0   | 1     | 0      |
| 1   | 1      | 0    | 33  | 2   | 2   | 0   | 1     | 0      |
| 1   | 1      | 0    | 34  | 3   | 1   | 0   | 1     | 0      |
| 1   | 1      | 0    | 35  | 0   | 4   | 0   | 1     | 0      |
| 1   | 1      | 0    | 36  | 2   | 2   | 0   | 1     | 0      |
| 1   | 1      | 0    | 37  | 2   | 2   | 0   | 1     | 0      |
| 1   | 1      | 0    | 38  | 2   | 2   | 0   | 1     | 0      |
| 1   | 1      | 22   | 3   | 4   | 0   | 0   | 1     | 0      |
| 1   | 1      | 22   | 4   | 2   | 2   | 0   | 1     | 0      |
| 1   | 1      | 22   | 5   | 3   | 1   | 0   | 1     | 0      |
| 1   | 1      | 22   | 6   | 2   | 2   | 0   | 1     | 0      |
| 1   | 1      | 22   | 7   | 3   | 1   | 0   | 1     | 0      |
| 1   | 1      | 22   | 8   | 2   | 2   | 0   | 1     | 0      |
| 1   | 1      | 22   | 9   | 3   | 1   | 0   | 1     | 0      |
| 1   | 1      | 22   | 10  | 2   | 2   | 0   | 1     | 0      |
| 1   | 1      | 22   | 11  | 3   | 3   | 0   | 1     | 0      |
| 1   | 1      | 22   | 12  | 2   | 2   | 0   | 1     | 0      |
| 1   | 1      | 22   | 13  | 4   | 4   | 0   | 1     | 0      |
| 1   | 1      | 22   | 14  | 3   | 3   | 0   | 1     | 0      |
| 1   | 1      | 22   | 15  | 4   | 4   | 0   | 1     | 0      |
| 1   | 1      | 22   | 16  | -99 | -99 | 1   | 1     | 0      |
| 1   | 1      | 22   | 17  | 0   | 4   | 0   | 1     | 0      |
| 1   | 1      | 22   | 18  | 3   | 3   | 0   | 1     | 0      |
| 1   | 1      | 22   | 19  | 0   | 4   | 0   | 1     | 0      |
| 1   | 1      | 22   | 20  | 0   | 4   | 0   | 1     | 0      |
| 1   | 1      | 22   | 21  | 1   | 3   | 0   | 1     | 0      |
| 1   | 1      | 22   | 22  | 2   | 2   | 0   | 1     | 0      |
| 1   | 1      | 22   | 23  | 0   | 0   | 0   | 1     | 0      |
| 1   | 1      | 22   | 24  | 2   | 2   | 0   | 1     | 0      |
| 1   | 1      | 22   | 25  | 1   | 1   | 0   | 1     | 0      |
| 1   | 1      | 22   | 26  | 3   | 3   | 0   | 1     | 0      |
| 1   | 1      | 22   | 27  | 2   | 2   | 0   | 1     | 0      |
| 1   | 1      | 22   | 28  | 0   | 0   | 0   | 1     | 0      |
| 1   | 1      | 22   | 29  | 1   | 1   | 0   | 1     | 0      |
| 1   | 1      | 22   | 30  | 2   | 2   | 0   | 1     | 0      |
| 1   | 1      | 22   | 31  | 3   | 1   | 0   | 1     | 0      |
| 1   | 1      | 22   | 32  | 0   | 4   | 0   | 1     | 0      |
| 1   | 1      | 22   | 33  | 2   | 2   | 0   | 1     | 0      |
| 1   | 1      | 22   | 34  | 3   | 1   | 0   | 1     | 0      |
| 1   | 1      | 22   | 35  | 0   | 4   | 0   | 1     | 0      |
| 1   | 1      | 22   | 36  | 2   | 2   | 0   | 1     | 0      |
| 1   | 1      | 22   | 37  | 2   | 2   | 0   | 1     | 0      |
| 1   | 1      | 22   | 38  | 2   | 2   | 0   | 1     | 0      |

## NONMEM code of the longitudinal IRT model

```

$SIZES      LTH=500 MAXIDS=50000 LNP4=10000
$PROBLEM    Longitudinal IRT model
$INPUT
ID          ; unique patient identifier
TRTACT      ; treatment arm (1=T-DM1, 2=capecitabine-plus-lapatinib)
TIME        ; time in days
VAR         ; variable: 3=item 1, 4=item 2, etc.
ODV         ; original dependent variable (score non-reversed)
DV          ; dependent variable (FACT-B (reversed) scores)
MDV         ; NONMEM missing data variable
BECOG       ; Baseline ECOG
RACE2A      ; Asian race

$DATA       example_dataset_FACTB.csv IGNORE=#
$PRED

;-----Item parameters -----
; ~.~.~.~.~.~.~.~. Physical well-being ~.~.~.~.~.~.~.~.
IF (VAR.EQ.3) THEN                                ; GP1 - I have lack of energy
DISC = THETA(1)                                   ;DISC_GP1
DIF1 = THETA(2)                                   ;DIF1_GP1
DIF2 = THETA(3)                                   ;DIF2_GP1
DIF3 = THETA(4)                                   ;DIF3_GP1
DIF4 = THETA(5)                                   ;DIF4_GP1
ENDIF

IF (VAR.EQ.4) THEN                                ; GP2 - I have nausea
DISC = THETA(6)                                   ;DISC_GP2
DIF1 = THETA(7)                                   ;DIF1_GP2
DIF2 = THETA(8)                                   ;DIF2_GP2
DIF3 = THETA(9)                                   ;DIF3_GP2
DIF4 = THETA(10)                                  ;DIF4_GP2
ENDIF

IF (VAR.EQ.5) THEN                                ; GP3 - I have troubles meeting the needs of my
family
DISC = THETA(11)                                  ;DISC_GP3
DIF1 = THETA(12)                                  ;DIF1_GP3
DIF2 = THETA(13)                                  ;DIF2_GP3
DIF3 = THETA(14)                                  ;DIF3_GP3
DIF4 = THETA(15)                                  ;DIF4_GP3
ENDIF

IF (VAR.EQ.6) THEN                                ; GP4 - I have pain
DISC = THETA(16)                                  ;DISC_GP4
DIF1 = THETA(17)                                  ;DIF1_GP4
DIF2 = THETA(18)                                  ;DIF2_GP4
DIF3 = THETA(19)                                  ;DIF3_GP4
DIF4 = THETA(20)                                  ;DIF4_GP4
ENDIF

IF (VAR.EQ.7) THEN                                ; GP5 - I am bothered by side effects of treatment
DISC = THETA(21)                                  ;DISC_GP5
DIF1 = THETA(22)                                  ;DIF1_GP5
DIF2 = THETA(23)                                  ;DIF2_GP5
DIF3 = THETA(24)                                  ;DIF3_GP5
DIF4 = THETA(25)                                  ;DIF4_GP5
ENDIF

IF (VAR.EQ.8) THEN                                ; GP6 - I feel ill
DISC = THETA(26)                                  ;DISC_GP6
DIF1 = THETA(27)                                  ;DIF1_GP6
DIF2 = THETA(28)                                  ;DIF2_GP6
DIF3 = THETA(29)                                  ;DIF3_GP6
DIF4 = THETA(30)                                  ;DIF4_GP6
ENDIF

IF (VAR.EQ.9) THEN                                ; GP7 - I am forced to spend time in bed
```

```
DISC = THETA(31)           ;DISC_GP7
DIF1 = THETA(32)           ;DIF1_GP7
DIF2 = THETA(33)           ;DIF2_GP7
DIF3 = THETA(34)           ;DIF3_GP7
DIF4 = THETA(35)           ;DIF4_GP7
ENDIF
```

```
; ~.~.~.~.~.~.~.~. Social/Family well-being ~.~.~.~.~.~.~.~.
```

```
IF (VAR.EQ.10) THEN                                     ; GS1 - I feel close to my friends
```

```
DISC = THETA(36)           ;DISC_GS1
DIF1 = THETA(37)           ;DIF1_GS1
DIF2 = THETA(38)           ;DIF2_GS1
DIF3 = THETA(39)           ;DIF3_GS1
DIF4 = THETA(40)           ;DIF4_GS1
ENDIF
```

```
IF (VAR.EQ.11) THEN
```

```
; GS2 - I get emotional support from my family
```

```
DISC = THETA(41)           ;DISC_GS2
DIF1 = THETA(42)           ;DIF1_GS2
DIF2 = THETA(43)           ;DIF2_GS2
DIF3 = THETA(44)           ;DIF3_GS2
DIF4 = THETA(45)           ;DIF4_GS2
ENDIF
```

```
IF (VAR.EQ.12) THEN
```

```
; GS3 - I get support from my friends
```

```
DISC = THETA(46)           ;DISC_GS3
DIF1 = THETA(47)           ;DIF1_GS3
DIF2 = THETA(48)           ;DIF2_GS3
DIF3 = THETA(49)           ;DIF3_GS3
DIF4 = THETA(50)           ;DIF4_GS3
ENDIF
```

```
IF (VAR.EQ.13) THEN
```

```
; GS4 - My family has accepted my illness
```

```
DISC = THETA(51)           ;DISC_GS4
DIF1 = THETA(52)           ;DIF1_GS4
DIF2 = THETA(53)           ;DIF2_GS4
DIF3 = THETA(54)           ;DIF3_GS4
DIF4 = THETA(55)           ;DIF4_GS4
ENDIF
```

```
IF (VAR.EQ.14) THEN
```

```
; GS5 - I am satisfied with family communication
```

```
about my illness
DISC = THETA(56)           ;DISC_GS5
DIF1 = THETA(57)           ;DIF1_GS5
DIF2 = THETA(58)           ;DIF2_GS5
DIF3 = THETA(59)           ;DIF3_GS5
DIF4 = THETA(60)           ;DIF4_GS5
ENDIF
```

```
IF (VAR.EQ.15) THEN
is my main support)
```

```
; GS6 - I feel close to my partner (or the person who
```

```
DISC = THETA(61)           ;DISC_GS6
DIF1 = THETA(62)           ;DIF1_GS6
DIF2 = THETA(63)           ;DIF2_GS6
DIF3 = THETA(64)           ;DIF3_GS6
DIF4 = THETA(65)           ;DIF4_GS6
ENDIF
```

```
IF (VAR.EQ.16) THEN
```

```
; GS7 - I am satisfied with my sex life
```

```
DISC = THETA(66)           ;DISC_GS7
DIF1 = THETA(67)           ;DIF1_GS7
DIF2 = THETA(68)           ;DIF2_GS7
DIF3 = THETA(69)           ;DIF3_GS7
DIF4 = THETA(70)           ;DIF4_GS7
ENDIF
```

```
; ~.~.~.~.~.~.~.~. Emotional well-being ~.~.~.~.~.~.~.~.
```

```
IF (VAR.EQ.17) THEN
```

```
; GE1 - I feel sad
```

```
DISC = THETA(71)           ;DISC_GE1
```

```

DIF1 = THETA(72)           ;DIF1_GE1
DIF2 = THETA(73)           ;DIF2_GE1
DIF3 = THETA(74)           ;DIF3_GE1
DIF4 = THETA(75)           ;DIF4_GE1
ENDIF

IF(VAR.EQ.18) THEN                ; GE2 - I am satisfied with how I am coping with my
illness
DISC = THETA(76)           ;DISC_GE2
DIF1 = THETA(77)           ;DIF1_GE2
DIF2 = THETA(78)           ;DIF2_GE2
DIF3 = THETA(79)           ;DIF3_GE2
DIF4 = THETA(80)           ;DIF4_GE2
ENDIF

IF(VAR.EQ.19) THEN                ; GE3 - I am losing hope in the fight against illness
DISC = THETA(81)           ;DISC_GE3
DIF1 = THETA(82)           ;DIF1_GE3
DIF2 = THETA(83)           ;DIF2_GE3
DIF3 = THETA(84)           ;DIF3_GE3
DIF4 = THETA(85)           ;DIF4_GE3
ENDIF

IF(VAR.EQ.20) THEN                ; GE4 - I feel nervous
DISC = THETA(86)           ;DISC_GE4
DIF1 = THETA(87)           ;DIF1_GE4
DIF2 = THETA(88)           ;DIF2_GE4
DIF3 = THETA(89)           ;DIF3_GE4
DIF4 = THETA(90)           ;DIF4_GE4
ENDIF

IF(VAR.EQ.21) THEN                ; GE5 - I worry about dying
DISC = THETA(91)           ;DISC_GE5
DIF1 = THETA(92)           ;DIF1_GE5
DIF2 = THETA(93)           ;DIF2_GE5
DIF3 = THETA(94)           ;DIF3_GE5
DIF4 = THETA(95)           ;DIF4_GE5
ENDIF

IF(VAR.EQ.22) THEN                ; GE6 - I worry that my condition will get worse
DISC = THETA(96)           ;DISC_GE6
DIF1 = THETA(97)           ;DIF1_GE6
DIF2 = THETA(98)           ;DIF2_GE6
DIF3 = THETA(99)           ;DIF3_GE6
DIF4 = THETA(100)          ;DIF4_GE6
ENDIF

; ~.~.~.~.~.~.~.~. Functional well-being ~.~.~.~.~.~.~.~.
IF(VAR.EQ.23) THEN                ; GF1 - I am able to work (include work at home)
DISC = THETA(101)          ;DISC_GF1
DIF1 = THETA(102)          ;DIF1_GF1
DIF2 = THETA(103)          ;DIF2_GF1
DIF3 = THETA(104)          ;DIF3_GF1
DIF4 = THETA(105)          ;DIF4_GF1
ENDIF

IF(VAR.EQ.24) THEN                ; GF2 - My work (include work at home) is fullfilling
DISC = THETA(106)          ;DISC_GF2
DIF1 = THETA(107)          ;DIF1_GF2
DIF2 = THETA(108)          ;DIF2_GF2
DIF3 = THETA(109)          ;DIF3_GF2
DIF4 = THETA(110)          ;DIF4_GF2
ENDIF

IF(VAR.EQ.25) THEN                ; GF3 - I am able to enjoy life
DISC = THETA(111)          ;DISC_GF3
DIF1 = THETA(112)          ;DIF1_GF3
DIF2 = THETA(113)          ;DIF2_GF3
DIF3 = THETA(114)          ;DIF3_GF3

```

```

DIF4 = THETA(115)           ;DIF4_GF3
ENDIF

IF(VAR.EQ.26) THEN
DISC = THETA(116)           ;DISC_GF4
DIF1 = THETA(117)           ;DIF1_GF4
DIF2 = THETA(118)           ;DIF2_GF4
DIF3 = THETA(119)           ;DIF3_GF4
DIF4 = THETA(120)           ;DIF4_GF4
ENDIF

IF(VAR.EQ.27) THEN
DISC = THETA(121)           ;DISC_GF5
DIF1 = THETA(122)           ;DIF1_GF5
DIF2 = THETA(123)           ;DIF2_GF5
DIF3 = THETA(124)           ;DIF3_GF5
DIF4 = THETA(125)           ;DIF4_GF5
ENDIF

IF(VAR.EQ.28) THEN
DISC = THETA(126)           ;DISC_GF6
DIF1 = THETA(127)           ;DIF1_GF6
DIF2 = THETA(128)           ;DIF2_GF6
DIF3 = THETA(129)           ;DIF3_GF6
DIF4 = THETA(130)           ;DIF4_GF6
ENDIF

IF(VAR.EQ.29) THEN
right now
DISC = THETA(131)           ;DISC_GF7
DIF1 = THETA(132)           ;DIF1_GF7
DIF2 = THETA(133)           ;DIF2_GF7
DIF3 = THETA(134)           ;DIF3_GF7
DIF4 = THETA(135)           ;DIF4_GF7
ENDIF

; ~.~.~.~.~.~.~. Breast cancer subscale ~.~.~.~.~.~.~.~.
IF(VAR.EQ.30) THEN
DISC = THETA(136)           ;DISC_B1
DIF1 = THETA(137)           ;DIF1_B1
DIF2 = THETA(138)           ;DIF2_B1
DIF3 = THETA(139)           ;DIF3_B1
DIF4 = THETA(140)           ;DIF4_B1
ENDIF

IF(VAR.EQ.31) THEN
DISC = THETA(141)           ;DISC_B2
DIF1 = THETA(142)           ;DIF1_B2
DIF2 = THETA(143)           ;DIF2_B2
DIF3 = THETA(144)           ;DIF3_B2
DIF4 = THETA(145)           ;DIF4_B2
ENDIF

IF(VAR.EQ.32) THEN
DISC = THETA(146)           ;DISC_B3
DIF1 = THETA(147)           ;DIF1_B3
DIF2 = THETA(148)           ;DIF2_B3
DIF3 = THETA(149)           ;DIF3_B3
DIF4 = THETA(150)           ;DIF4_B3
ENDIF

IF(VAR.EQ.33) THEN
DISC = THETA(151)           ;DISC_B4
DIF1 = THETA(152)           ;DIF1_B4
DIF2 = THETA(153)           ;DIF2_B4
DIF3 = THETA(154)           ;DIF3_B4
DIF4 = THETA(155)           ;DIF4_B4
ENDIF

```

```

IF(VAR.EQ.34) THEN                                     ; B5 - I am bothered by hair loss
DISC = THETA(156)                                     ;DISC_B5
DIF1 = THETA(157)                                    ;DIF1_B5
DIF2 = THETA(158)                                    ;DIF2_B5
DIF3 = THETA(159)                                    ;DIF3_B5
DIF4 = THETA(160)                                    ;DIF4_B5
ENDIF

IF(VAR.EQ.35) THEN                                     ; B6 - I worry that other members of my family get
same illness
DISC = THETA(161)                                     ;DISC_B6
DIF1 = THETA(162)                                    ;DIF1_B6
DIF2 = THETA(163)                                    ;DIF2_B6
DIF3 = THETA(164)                                    ;DIF3_B6
DIF4 = THETA(165)                                    ;DIF4_B6
ENDIF

IF(VAR.EQ.36) THEN                                     ; B7 - I worry about the effect of stress on my
illness
DISC = THETA(166)                                     ;DISC_B7
DIF1 = THETA(167)                                    ;DIF1_B7
DIF2 = THETA(168)                                    ;DIF2_B7
DIF3 = THETA(169)                                    ;DIF3_B7
DIF4 = THETA(170)                                    ;DIF4_B7
ENDIF

IF(VAR.EQ.37) THEN                                     ; B8 - I am bothered by a change of weight
DISC = THETA(171)                                     ;DISC_B8
DIF1 = THETA(172)                                    ;DIF1_B8
DIF2 = THETA(173)                                    ;DIF2_B8
DIF3 = THETA(174)                                    ;DIF3_B8
DIF4 = THETA(175)                                    ;DIF4_B8
ENDIF

IF(VAR.EQ.38) THEN                                     ; B9 - I am able to feel like a woman
DISC = THETA(176)                                     ;DISC_B9
DIF1 = THETA(177)                                    ;DIF1_B9
DIF2 = THETA(178)                                    ;DIF2_B9
DIF3 = THETA(179)                                    ;DIF3_B9
DIF4 = THETA(180)                                    ;DIF4_B9
ENDIF

;----- Baseline -----
; Define covariate relationships
IF(RACE2A.EQ.0) BASESRACE2A = 0 ; Most common
IF(RACE2A.EQ.1) BASESRACE2A = ( 0 + THETA(200))
IF(RACE2A.EQ.-99) BASESRACE2A = 0 ; Missing data

BASESCOV=BASESRACE2A

IF(BECOG.EQ.0) BASEPBECOG = 0 ; Most common
IF(BECOG.EQ.1) BASEPBECOG = ( 0 + THETA(197))
IF(BECOG.EQ.-99) BASEPBECOG = 0 ; Missing data

BASEPCOV=BASEPBECOG

IF(RACE2A.EQ.0) BASEFRACE2A = 0 ; Most common
IF(RACE2A.EQ.1) BASEFRACE2A = ( 0 + THETA(198))
IF(RACE2A.EQ.-99) BASEFRACE2A = 0 ; Missing data

IF(BECOG.EQ.0) BASEFBECOG = 0 ; Most common
IF(BECOG.EQ.1) BASEFBECOG = ( 0 + THETA(197))
IF(BECOG.EQ.-99) BASEFBECOG = 0 ; Missing data

BASEFCOV=BASEFBECOG+BASEFRACE2A

; Baseline W_0
TVBASEP = THETA(181)

```

```
TVBASEP = BASEPCOV+TVBASEP
TVBASES = THETA(182)
```

```
TVBASES = BASESCOV+TVBASES
TVBASEE = THETA(183)
TVBASEF = THETA(184)
```

```
TVBASEF = BASEFCOV+TVBASEF
```

```
BASEP = TVBASEP + ETA(1)
BASES = TVBASES + ETA(2)
BASEE = TVBASEE + ETA(3)
BASEF = TVBASEF + ETA(4)
```

```
;----- Time effect -----
```

```
; Asymptote W_ss
IF (TRTACT.EQ.1) THEN ; T-DM1
  TVPROP = THETA(185)
  TVPROS = THETA(186)
  TVPROE = THETA(187)
  TVPROF = THETA(188)
ELSE ; Control
  TVPROP = THETA(189)
  TVPROS = THETA(190)
  TVPROE = THETA(187)
  TVPROF = THETA(192)
ENDIF
```

```
PROGP = TVPROP + ETA(5) + ETA(6) ; Common IIV and ISV for both arms
PROGS = TVPROS + ETA(5) + ETA(7)
PROGE = TVPROE + ETA(5) + ETA(8)
PROGF = TVPROF + ETA(5) + ETA(9)
```

```
; Half-life T1/2
HLPROGP = THETA(193) *EXP(ETA(10)) ; Common TV and IIV for both arms
HLPROGS = THETA(194) *EXP(ETA(10))
HLPROGE = THETA(195) *EXP(ETA(10))
HLPROGF = THETA(196) *EXP(ETA(10))
```

```
;-----Hidden variable model-----
```

```
PWB = BASEP + PROGP*(1-EXP(-LOG(2)/HLPROGP*TIME))
SWB = BASES + PROGS*(1-EXP(-LOG(2)/HLPROGS*TIME))
EWB = BASEE + PROGE*(1-EXP(-LOG(2)/HLPROGE*TIME))
FWB = BASEF + PROGF*(1-EXP(-LOG(2)/HLPROGF*TIME))
```

```
;----- model implementation grades 0 - 4 -----
```

```
IF (VAR.GE.3.AND.VAR.LE.9) PSI = PWB ; Physical well-being
IF (VAR.GE.10.AND.VAR.LE.16) PSI = SWB ; Social/Family well-being
IF (VAR.GE.17.AND.VAR.LE.22) PSI = EWB ; Emotional well-being
IF (VAR.GE.23.AND.VAR.LE.29) PSI = FWB ; Functional well-being
```

```
; ----- Reassign breast cancer subscale
```

```
IF (VAR.EQ.30) PSI = PWB ; Short of breath
IF (VAR.EQ.31) PSI = EWB ; way I dress
IF (VAR.EQ.32) PSI = PWB ; arms swollen or tender
IF (VAR.EQ.33) PSI = FWB ; sexually attractive
IF (VAR.GE.34.AND.VAR.LE.37) PSI = EWB ; bothered by hair loss - family mb get same illness -
effect of stress - change of wt
IF (VAR.EQ.38) PSI = FWB ; feel like a woman
```

```
; constrain DIFG5 >= DIFG4 >= DIFG3 >= DIFG2 >= DIFG1
```

```
DIFG1 = DIF1
DIFG2 = DIFG1+DIF2
DIFG3 = DIFG2+DIF3
DIFG4 = DIFG3+DIF4
```

```
; DIFGx corresponds to bj,x in the manuscript
```

```
; probability Y>=k, parameterized to avoid overflow
```

```
E1 = DISC*(PSI-DIFG1)
```

```

E2 = DISC*(PSI-DIFG2)
E3 = DISC*(PSI-DIFG3)
E4 = DISC*(PSI-DIFG4)

PGE1 = EXP(E1)/(1+EXP(E1))
PGE2 = EXP(E2)/(1+EXP(E2))
PGE3 = EXP(E3)/(1+EXP(E3))
PGE4 = EXP(E4)/(1+EXP(E4))

IF(E1.GT.0) PGE1 = 1/(1+EXP(-E1))
IF(E2.GT.0) PGE2 = 1/(1+EXP(-E2))
IF(E3.GT.0) PGE3 = 1/(1+EXP(-E3))
IF(E4.GT.0) PGE4 = 1/(1+EXP(-E4))

; probability Y==k
P0 = 1-PGE1
P1 = PGE1-PGE2
P2 = PGE2-PGE3
P3 = PGE3-PGE4
P4 = PGE4

IF(DV.EQ.0) P = P0
IF(DV.EQ.1) P = P1
IF(DV.EQ.2) P = P2
IF(DV.EQ.3) P = P3
IF(DV.EQ.4) P = P4

;-----Response probability prediction-----
IF(P.LT.1E-16)      P = 1E-16      ; protection for P->0
IF(P.GT.(1-1E-16)) P = 1-1E-16    ; protection for P->1
Y = -2*LOG(P)

;-----Simulation code-----
REP=IREP
IF(ICALL.EQ.4) THEN
CALL RANDOM (2,R)      ; Call random variable from a uniform distribution
SDV = 0                ; Simulated DV
IF(R.LT.PGE1) SDV = 1
IF(R.LT.PGE2) SDV = 2
IF(R.LT.PGE3) SDV = 3
IF(R.LT.PGE4) SDV = 4
DV = SDV
ENDIF

$ESTIMATION MAXEVAL=0 METHOD=COND LAPLACE -2LL PRINT=1

$THETA (0,2.06967) FIX ; 1      DISC_GP1
-2.32367 FIX ; 2      DIF1_GP1
(0,0.973293,1000000) FIX ; 3 DIF2_GP1
(0,1.02383,1000000) FIX ; 4 DIF3_GP1
(0,1.27388,1000000) FIX ; 5 DIF4_GP1
(0,1.46945) FIX ; 6      DISC_GP2
-3.99677 FIX ; 7      DIF1_GP2
(0,1.02473,1000000) FIX ; 8 DIF2_GP2
(0,1.15742,1000000) FIX ; 9 DIF3_GP2
(0,1.26797,1000000) FIX ; 10 DIF4_GP2
(0,2.55835) FIX ; 11 DISC_GP3
-2.25456 FIX ; 12      DIF1_GP3
(0,0.68862,1000000) FIX ; 13 DIF2_GP3
(0,0.876377,1000000) FIX ; 14      DIF3_GP3
(0,0.977248,1000000) FIX ; 15      DIF4_GP3
(0,1.74575) FIX ; 16 DISC_GP4
-2.7107 FIX ; 17      DIF1_GP4
(0,1.0448,1000000) FIX ; 18 DIF2_GP4
(0,0.964461,1000000) FIX ; 19      DIF3_GP4
(0,1.22583,1000000) FIX ; 20 DIF4_GP4
(0,2.06659) FIX ; 21 DISC_GP5
-2.69692 FIX ; 22      DIF1_GP5
(0,0.878561,1000000) FIX ; 23      DIF2_GP5

```



(0,0.991375,1000000) FIX ; 24 DIF3\_GP5  
(0,1.21088,1000000) FIX ; 25 DIF4\_GP5  
(0,3.14735) FIX ; 26 DISC\_GP6  
-2.46072 FIX ; 27 DIF1\_GP6  
(0,0.736756,1000000) FIX ; 28 DIF2\_GP6  
(0,0.870586,1000000) FIX ; 29 DIF3\_GP6  
(0,0.914412,1000000) FIX ; 30 DIF4\_GP6  
(0,2.83468) FIX ; 31 DISC\_GP7  
-2.63326 FIX ; 32 DIF1\_GP7  
(0,0.764731,1000000) FIX ; 33 DIF2\_GP7  
(0,0.708716,1000000) FIX ; 34 DIF3\_GP7  
(0,0.91286,1000000) FIX ; 35 DIF4\_GP7  
(0,3.0398) FIX ; 36 DISC\_GS1  
-2.17664 FIX ; 37 DIF1\_GS1  
(0,0.629604,1000000) FIX ; 38 DIF2\_GS1  
(0,0.718636,1000000) FIX ; 39 DIF3\_GS1  
(0,0.831105,1000000) FIX ; 40 DIF4\_GS1  
(0,4.67679) FIX ; 41 DISC\_GS2  
-2.10385 FIX ; 42 DIF1\_GS2  
(0,0.477812,1000000) FIX ; 43 DIF2\_GS2  
(0,0.593268,1000000) FIX ; 44 DIF3\_GS2  
(0,0.735385,1000000) FIX ; 45 DIF4\_GS2  
(0,3.54032) FIX ; 46 DISC\_GS3  
-1.85062 FIX ; 47 DIF1\_GS3  
(0,0.357667,1000000) FIX ; 48 DIF2\_GS3  
(0,0.623387,1000000) FIX ; 49 DIF3\_GS3  
(0,0.80675,1000000) FIX ; 50 DIF4\_GS3  
(0,2.44827) FIX ; 51 DIF4\_GS4  
-2.24657 FIX ; 52 DIF1\_GS4  
(0,0.566298,1000000) FIX ; 53 DIF2\_GS4  
(0,0.792694,1000000) FIX ; 54 DIF3\_GS4  
(0,0.890613,1000000) FIX ; 55 DIF4\_GS4  
(0,3.13366) FIX ; 56 DISC\_GS5  
-2.17512 FIX ; 57 DIF1\_GS5  
(0,0.596025,1000000) FIX ; 58 DIF2\_GS5  
(0,0.780144,1000000) FIX ; 59 DIF3\_GS5  
(0,0.821042,1000000) FIX ; 60 DIF4\_GS5  
(0,2.87691) FIX ; 61 DISC\_GS6  
-2.0057 FIX ; 62 DIF1\_GS6  
(0,0.350071,1000000) FIX ; 63 DIF2\_GS6  
(0,0.639858,1000000) FIX ; 64 DIF3\_GS6  
(0,0.698017,1000000) FIX ; 65 DIF4\_GS6  
(0,1.48866) FIX ; 66 DISC\_GS7  
-1.42423 FIX ; 67 DIF1\_GS7  
(0,0.465285,1000000) FIX ; 68 DIF2\_GS7  
(0,0.979391,1000000) FIX ; 69 DIF3\_GS7  
(0,1.04301,1000000) FIX ; 70 DIF4\_GS7  
(0,2.19028) FIX ; 71 DISC\_GE1  
-2.47112 FIX ; 72 DIF1\_GE1  
(0,0.982771,1000000) FIX ; 73 DIF2\_GE1  
(0,1.09003,1000000) FIX ; 74 DIF3\_GE1  
(0,1.21093,1000000) FIX ; 75 DIF4\_GE1  
(0,0.829776) FIX ; 76 DISC\_GE2  
-3.72614 FIX ; 77 DIF1\_GE2  
(0,1.38475,1000000) FIX ; 78 DIF2\_GE2  
(0,1.94605,1000000) FIX ; 79 DIF3\_GE2  
(0,2.19051,1000000) FIX ; 80 DIF4\_GE2  
(0,2.06367) FIX ; 81 DISC\_GE3  
-2.67833 FIX ; 82 DIF1\_GE3  
(0,0.610841,1000000) FIX ; 83 DIF2\_GE3  
(0,1.03572,1000000) FIX ; 84 DIF3\_GE3  
(0,0.875755,1000000) FIX ; 85 DIF4\_GE3  
(0,2.04486) FIX ; 86 DISC\_GE4  
-2.22963 FIX ; 87 DIF1\_GE4  
(0,0.793616,1000000) FIX ; 88 DIF2\_GE4  
(0,0.938793,1000000) FIX ; 89 DIF3\_GE4  
(0,1.36667,1000000) FIX ; 90 DIF4\_GE4  
(0,2.18015) FIX ; 91 DISC\_GE5  
-1.68771 FIX ; 92 DIF1\_GE5

(0,0.571225,1000000) FIX ; 93 DIF2\_GE5  
(0,0.739694,1000000) FIX ; 94 DIF3\_GE5  
(0,1.21331,1000000) FIX ; 95 DIF4\_GE5  
(0,2.42857) FIX ; 96 DISC\_GE6  
-1.35576 FIX ; 97 DIF1\_GE6  
(0,0.683,1000000) FIX ; 98 DIF2\_GE6  
(0,0.731477,1000000) FIX ; 99 DIF3\_GE6  
(0,1.34569,1000000) FIX ; 100 DIF4\_GE6  
(0,2.03488) FIX ; 101 DISC\_GF1  
-1.95685 FIX ; 102 DIF1\_GF1  
(0,0.925233,1000000) FIX ; 103 DIF2\_GF1  
(0,1.05317,1000000) FIX ; 104 DIF3\_GF1  
(0,1.17342,1000000) FIX ; 105 DIF4\_GF1  
(0,2.61787) FIX ; 106 DISC\_GF2  
-1.64736 FIX ; 107 DIF1\_GF2  
(0,0.647825,1000000) FIX ; 108 DIF2\_GF2  
(0,0.952437,1000000) FIX ; 109 DIF3\_GF2  
(0,1.03989,1000000) FIX ; 110 DIF4\_GF2  
(0,4.27106) FIX ; 111 DISC\_GF3  
-1.93658 FIX ; 112 DIF1\_GF3  
(0,0.735048,1000000) FIX ; 113 DIF2\_GF3  
(0,0.864236,1000000) FIX ; 114 DIF3\_GF3  
(0,0.892655,1000000) FIX ; 115 DIF4\_GF3  
(0,1.68813) FIX ; 116 DISC\_GF4  
-2.33858 FIX ; 117 DIF1\_GF4  
(0,0.762524,1000000) FIX ; 118 DIF2\_GF4  
(0,1.0446,1000000) FIX ; 119 DIF3\_GF4  
(0,1.1959,1000000) FIX ; 120 DIF4\_GF4  
(0,1.43132) FIX ; 121 DISC\_GF5  
-2.55648 FIX ; 122 DIF1\_GF5  
(0,1.05813,1000000) FIX ; 123 DIF2\_GF5  
(0,1.46053,1000000) FIX ; 124 DIF3\_GF5  
(0,1.23445,1000000) FIX ; 125 DIF4\_GF5  
(0,3.75996) FIX ; 126 DISC\_GF6  
-1.79901 FIX ; 127 DIF1\_GF6  
(0,0.689372,1000000) FIX ; 128 DIF2\_GF6  
(0,0.885276,1000000) FIX ; 129 DIF3\_GF6  
(0,0.844313,1000000) FIX ; 130 DIF4\_GF6  
(0,3.63157) FIX ; 131 DISC\_GF7  
-1.73504 FIX ; 132 DIF1\_GF7  
(0,0.683668,1000000) FIX ; 133 DIF2\_GF7  
(0,0.996186,1000000) FIX ; 134 DIF3\_GF7  
(0,0.952683,1000000) FIX ; 135 DIF4\_GF7  
(0,1.19272) FIX ; 136 DISC\_B1  
-3.90982 FIX ; 137 DIF1\_B1  
(0,1.27754,1000000) FIX ; 138 DIF2\_B1  
(0,1.20796,1000000) FIX ; 139 DIF3\_B1  
(0,1.29881,1000000) FIX ; 140 DIF4\_B1  
(0,0.834601) FIX ; 141 DISC\_B2  
-4.13157 FIX ; 142 DIF1\_B2  
(0,1.17503,1000000) FIX ; 143 DIF2\_B2  
(0,1.62091,1000000) FIX ; 144 DIF3\_B2  
(0,1.40491,1000000) FIX ; 145 DIF4\_B2  
(0,0.765407) FIX ; 146 DISC\_B3  
-4.59083 FIX ; 147 DIF1\_B3  
(0,1.64436,1000000) FIX ; 148 DIF2\_B3  
(0,1.22619,1000000) FIX ; 149 DIF3\_B3  
(0,1.49325,1000000) FIX ; 150 DIF4\_B3  
(0,1.41193) FIX ; 151 DISC\_B4  
-1.2194 FIX ; 152 DIF1\_B4  
(0,0.776052,1000000) FIX ; 153 DIF2\_B4  
(0,1.44336,1000000) FIX ; 154 DIF3\_B4  
(0,1.22818,1000000) FIX ; 155 DIF4\_B4  
(0,0.839776) FIX ; 156 DISC\_B5  
-2.81542 FIX ; 157 DIF1\_B5  
(0,0.796335,1000000) FIX ; 158 DIF2\_B5  
(0,0.853956,1000000) FIX ; 159 DIF3\_B5  
(0,1.00399,1000000) FIX ; 160 DIF4\_B5  
(0,1.05692) FIX ; 161 DISC\_B6

```

-1.32897 FIX ; 162    DIF1_B6
(0,1.08275,1000000) FIX ; 163    DIF2_B6
(0,0.766046,1000000) FIX ; 164    DIF3_B6
(0,1.40185,1000000) FIX ; 165    DIF4_B6
(0,1.50985) FIX ; 166 DISC_B7
-1.79547 FIX ; 167    DIF1_B7
(0,1.20925,1000000) FIX ; 168    DIF2_B7
(0,0.963077,1000000) FIX ; 169    DIF3_B7
(0,1.28856,1000000) FIX ; 170    DIF4_B7
(0,0.763562) FIX ; 171    DISC_B8
-3.27534 FIX ; 172    DIF1_B8
(0,1.31906,1000000) FIX ; 173    DIF2_B8
(0,1.30604,1000000) FIX ; 174    DIF3_B8
(0,1.38463,1000000) FIX ; 175    DIF4_B8
(0,1.52447) FIX ; 176 DISC_B9
-2.20007 FIX ; 177    DIF1_B9
(0,0.975209,1000000) FIX ; 178    DIF2_B9
(0,1.1158,1000000) FIX ; 179 DIF3_B9
(0,1.24656,1000000) FIX ; 180    DIF4_B9
0 FIX ; 181 BASE_PWB
-0.0901136 ; 182 BASE_SWB
0 FIX ; 183 BASE_EWB
0 FIX ; 184 BASE_FWB
0 FIX ; 185 PROGF TDM1
-0.243662 ; 185 PROG_SWB
0.294583 ; 186 PROG_EWB
0 FIX ; 188 PROGF TDM1
-0.250895 ; 189 PROG_PWB REF
-0.13742 ; 190 PROG_SWB REF
0 FIX ; 191 PROGE CONTROL
0 FIX ; 192 PROGF CONTROL
(0,30.6837) ; 193 HLPROGP
(0,116.559) ; 194 HLPROGS
(0,35.0815) ; 195 HLPROGE
(0,48.9207) ; 196 HLPROGF
$THETA (-20,-0.268364,20) ; 197 BASEFPBECOG1
$THETA (-20,-0.181025,20) ; 198 BASEFRACE2A1
$THETA 0 FIX
$THETA (-20,-0.441136,20) ; 200 BASESRACE2A1
$OMEGA BLOCK(5)
0.574243 ; OM_BASE_PWB
0.230733 0.475783 ; OM_BASE_SWB
0.483043 0.282686 0.65536 ; OM_BASE_EWB
0.479774 0.418151 0.441594 0.618078 ; OM_BASE_FWB
-0.146212 -0.0939033 -0.136536 -0.138096 0.342357 ; OM_PROG_IIV ALL
$OMEGA BLOCK(1)
0.0267419 ; OM_PROG_ISV TDM1
$OMEGA BLOCK(1) SAME
$OMEGA BLOCK(1) SAME
$OMEGA BLOCK(1) SAME
$OMEGA 1.45579 ; OM_HLPROGP TDM1

```
